## Long-term Transverse Imaging of the Hippocampus with Glass Microperiscopes

William T Redman<sup>1</sup>, Nora S Wolcott<sup>2</sup>, Luca Montelisciani<sup>3</sup>, Gabriel Luna<sup>4</sup>, Tyler D Marks<sup>4</sup>,  
Kevin K Sit<sup>5</sup>, Che-Hang Yu<sup>6</sup>, Spencer L Smith<sup>4,6</sup>, and Michael J Goard<sup>2,4,5,\*</sup>

<sup>1</sup>Interdepartmental Graduate Program in Dynamical Neuroscience,  
University of California, Santa Barbara,  
Santa Barbara, CA 93106, USA

<sup>2</sup>Department of Molecular, Cellular, and Developmental Biology,  
University of California, Santa Barbara,  
Santa Barbara, CA 93106, USA

<sup>3</sup>Cognitive and Systems Neuroscience Group,  
University of Amsterdam,  
Amsterdam, NL 1098 XH

<sup>4</sup>Neuroscience Research Institute,  
University of California, Santa Barbara,  
Santa Barbara, CA 93106, USA

<sup>5</sup>Department of Psychological and Brain Sciences,  
University of California, Santa Barbara,  
Santa Barbara, CA 93106, USA

<sup>6</sup>Department of Electrical and Computer Engineering,  
University of California, Santa Barbara,  
Santa Barbara, CA 93106, USA

\*Correspondence to: [michael.goard@lifesci.ucsb.edu](mailto:michael.goard@lifesci.ucsb.edu)

## 1 **ABSTRACT**

2 The hippocampus consists of a stereotyped neuronal circuit repeated along the septal-temporal  
3 axis. This transverse circuit contains distinct subfields with stereotyped connectivity that support  
4 crucial cognitive processes, including episodic and spatial memory. However, comprehensive  
5 measurements across the transverse hippocampal circuit *in vivo* are intractable with existing  
6 techniques. Here, we developed an approach for two-photon imaging of the transverse  
7 hippocampal plane in awake mice via implanted glass microperiscopes, allowing optical access  
8 to the major hippocampal subfields and to the dendritic arbor of pyramidal neurons. Using this  
9 approach, we tracked dendritic morphological dynamics on CA1 apical dendrites and  
10 characterized spine turnover. We then used calcium imaging to quantify the prevalence of place  
11 and speed cells across subfields. Finally, we measured the anatomical distribution of spatial  
12 information, finding a non-uniform distribution of spatial selectivity along the DG-to-CA1 axis.  
13 This approach extends the existing toolbox for structural and functional measurements of  
14 hippocampal circuitry.

15

## 16 **INTRODUCTION**

17 The hippocampus is critical for episodic and spatial memories<sup>1-3</sup>, but the neural computations  
18 underlying these functions are not well understood. The trisynaptic circuit linking entorhinal  
19 cortex (EC) to dentate gyrus (DG), DG to CA3, and CA3 to CA1 is believed to endow the  
20 hippocampus with its functional capabilities. Since the circuit was first described in the  
21 anatomical studies of Ramon y Cajal over a century ago<sup>4</sup>, considerable work has focused on  
22 each of the major hippocampal subfields (CA1-3 and DG) to identify their roles in hippocampal  
23 processing. The resulting body of literature has indicated that the subfields have related, but  
24 distinct roles in pattern separation and completion<sup>5-14</sup>, response to novelty<sup>15-19</sup>, and the  
25 encoding of social variables<sup>20-22</sup>. Additionally, there appear to be differences between the  
26 subfields in place field stability<sup>19,23,24</sup>. Although this work has increased our understanding of  
27 each of the subfields individually, it is not clear how neuronal activity is coordinated across the  
28 hippocampus.

29 This lack of knowledge comes, in part, from the technological limitations that prevent the  
30 recording of neuronal populations across hippocampal subfields in the same animal.  
31 Historically, electrophysiology has been the principal tool used to study the hippocampus.  
32 Electrophysiological recordings have the advantage of high temporal resolution and can directly  
33 measure spiking, but they are typically limited to small numbers of neurons in particular  
34 subfields. Additionally, localization of recorded neurons within the hippocampus is approximate,

35 requiring post-hoc histological analysis to estimate the position of the electrode tracks, and the  
36 distances between the recorded neurons and the electrode sites are poorly defined. In recent  
37 years, calcium imaging approaches (i.e. single photon mini-endoscopes and two-photon  
38 microscopy) have been used to record hippocampal activity, allowing for the simultaneous  
39 measurement of large numbers of neurons with known spatial relationships<sup>24–29</sup>. However, these  
40 approaches require aspiration of the overlying neocortex and are generally restricted to a single  
41 subfield for each animal.

42 Taken together, current experimental techniques are limited in their ability to: (1) record  
43 response dynamics and coordination across the hippocampus, (2) identify and distinguish  
44 between different neural subtypes, (3) allow for the chronic recording of cells across subfields,  
45 and (4) resolve key cellular structures, such as apical dendritic spines.

46 To address these challenges, we have developed a procedure for transverse imaging of  
47 the trisynaptic hippocampal circuit using chronically implanted glass microperiscopes. As has  
48 been found with previous studies using implanted microprisms in cortex<sup>30–33</sup>, the neural tissue  
49 remained intact and healthy for prolonged periods of time (up to 10 months), and both dendritic  
50 structure and calcium activity could be repeatedly measured in behaving mice. Optical modeling  
51 and point spread function measurements showed that axial resolution is decreased compared to  
52 traditional cranial windows, but is sufficient to image individual apical dendritic spines in  
53 hippocampal neurons several millimeters below the pial surface. Using this approach, we  
54 quantified spine turnover in CA1 apical dendrites across days. We then measured functional  
55 responses from CA1, CA3, and DG in head-fixed mice as they explored a floating carbon fiber  
56 arena<sup>34,35</sup>. We found neurons in all regions whose activity met criteria to be considered place  
57 cells (PC) and speed cells (SC). Further, we found non-uniform distributions of spatial  
58 information across the extent of the DG-to-CA1 axis, in agreement with earlier  
59 electrophysiological studies<sup>36–38</sup>. Taken together, this approach adds to the existing  
60 neurophysiological toolkit by enabling chronic structural and functional measurements across  
61 the entire transverse hippocampal circuit.

62

## 63 **RESULTS**

### 64 **Optical access to the transverse hippocampus using implanted microperiscopes**

65 In order to image the transverse hippocampal circuit using two-photon (2P) imaging, we  
66 developed a surgical procedure for chronically implanting a glass microperiscope into the septal  
67 (dorsomedial) end of the mouse hippocampus (Fig. 1A; see Methods). For imaging CA1 only,  
68 we used a 1 mm x 1 mm x 2 mm microperiscope (v1<sub>CA1</sub>; Fig 1B, left), and for imaging the entire

69 transverse hippocampus (CA1-CA3, DG), we used a 1.5 mm x 1.5 mm x 2.5 mm  
70 microperiscope ( $v_{2\text{HPC}}$ ; Fig 1B, right). The microperiscope hypotenuse was coated with  
71 enhanced aluminum in order to reflect the imaging plane orthogonally onto the transverse plane  
72 of the hippocampus (Fig. 1C, D). To insert the microperiscope, we made a single incision  
73 through the dura and tissue, then lowered the tip of the microperiscope into the incision, pushing  
74 the cortical tissue medially. Although this approach eliminated the need for the aspiration of  
75 cortical tissue typically performed prior to hippocampal imaging<sup>25</sup>, it nonetheless results in  
76 severed connections and compressed tissue medial to the implant. Since the septal end of the  
77 hippocampus is affected by the implant, we used immunohistochemistry to quantify the effect of  
78 microperiscope implantation on microglia and astrocyte proliferation as a function of distance  
79 from the prism face (Fig. 1E). Similar to previous research using microprism implants<sup>31</sup>, we  
80 found an increase in the prevalence of astrocytes and microglia  $<200\ \mu\text{m}$  from the  
81 microperiscope face, but the prevalence decreased past this distance and was indistinguishable  
82 from the control hemisphere 300-400  $\mu\text{m}$  from the microperiscope face (Fig. 1F).

83 Use of the microperiscope requires imaging through several millimeters of glass, which  
84 could cause beam clipping or optical aberrations, resulting in decreased optical resolution. To  
85 determine the extent to which this occurred in our experiments, we modeled the expected point  
86 spread function and compared it to the experimentally-determined point spread function  
87 measurements using fluorescent microspheres (Fig. S1). Compared to a standard cranial  
88 window, we found that the lateral resolution of the microperiscope, measured as the full width at  
89 half maximum (FWHM) of the fluorescent microsphere profile, was similar to a standard cover  
90 slip (coverslip:  $0.7\ \mu\text{m}$ ;  $v_{1\text{CA1}}$  microperiscope:  $1.0\ \mu\text{m}$ ; 2.5 mm microperiscope:  $0.7$ ; Fig. S1),  
91 while the axial resolution of the craniotomy window with the microperiscope was significantly  
92 lower (coverslip:  $3.0\ \mu\text{m}$ ; 2 mm microperiscope:  $9.0\ \mu\text{m}$ ; 2.5 mm microperiscope:  $7.0\ \mu\text{m}$ ; Fig.  
93 S1). Optical modeling indicates that the decrease in axial resolution is predominantly due to  
94 clipping of the excitation beam, resulting in a reduction of the functional numerical aperture of  
95 the imaging system (theoretical point spread function of  $v_{1\text{CA1}}$  microperiscope:  $10.9\ \mu\text{m}$ ;  $v_{2\text{HPC}}$   
96 microperiscope:  $7.7\ \mu\text{m}$ ; see Methods) rather than optical aberrations. As a result, use of  
97 adaptive optics did not significantly improve the axial resolution, though adaptive optics did  
98 improve the signal intensity by 40-80% (data not shown). Despite the decrease in axial  
99 resolution resulting from the microperiscopes, the resolution is still sufficient to clearly image  
100 individual HPC neurons (Fig. 1C) and sub-micron morphological structures (Fig. 2).

101

102



## 103 **Resolving spines on the apical dendrites of CA1**

104 Dendritic spines are highly dynamic and motile structures that serve as the postsynaptic sites of  
105 excitatory synapses in the hippocampus<sup>39,40</sup>. Previous *in vitro* studies suggest a role for dendritic  
106 spines in structural and functional plasticity, but the transient and dynamic nature of these  
107 structures make them ideally suited to being studied *in vivo*<sup>41–43</sup>. Although existing techniques  
108 allow imaging of spines on the basal CA1 dendrites near the surface of the hippocampus<sup>43,44</sup>,  
109 imaging the apical dendritic spines of hippocampal neurons has not previously been possible.  
110 Using the microperiscope, we were able to track dendritic spine dynamics throughout the  
111 somato-dendritic axis of both CA1 and CA3 neurons in intact mice.

112 In order to visualize apical dendrites in CA1 neurons, we implanted a cohort of Thy1-  
113 GFP-M mice, sparsely expressing GFP in a subset of pyramidal neurons<sup>45</sup>, with v1<sub>CA1</sub>  
114 microperiscopes (Fig. 2A; n = 7 mice). We focused on CA1 apical dendrites, but both apical and  
115 basal dendrites could be imaged in CA1-3 neurons. Although it is theoretically possible to image  
116 DG dendritic structures using the microperiscope, the Thy1-GFP-M mouse line has dense  
117 expression throughout DG (Fig. 1C), which prevented clear identification of distinct processes.  
118 To resolve individual spines along the dendrite, high-resolution images were taken from several  
119 axial planes spanning the segment, and a composite image was generated using a weighted  
120 average of individual planes (Fig. 2B, C; see Methods). We reduced noise by filtering and  
121 binarizing and isolated dendrites of interest for tracking across days (Fig. 2B-D; Fig. S2A; see  
122 Methods).

123 Previous studies have shown that dendritic spines fall into four major morphological  
124 subtypes: filopodium, thin, mushroom, and stubby<sup>46–48</sup>. We found that our resolution was  
125 sufficient to classify dendritic spines into their relative subtypes and evaluate density and  
126 turnover based on these parameters (Fig. 2E, F; Fig. S2B). Consistent with previous studies, we  
127 found a non-uniform distribution of dendritic spines: 30.4% thin, 41.0% stubby, 26.2%  
128 mushroom, and 2.3% filopodium ( $F(3,100) = 51.47$ ,  $p < 0.0001$ , one-way ANOVA; Fig. 2E). The  
129 low proportion of filopodium found in this and previous 2P imaging and histological studies<sup>49,50</sup>  
130 (2–3%), as compared to electron microscopy studies<sup>51,52</sup> (~7%), may result from the narrow  
131 width of these structures causing them to fall below the detection threshold. Consistent with  
132 previous work<sup>53–55</sup>, we found that particular classes, such as filopodium, had a high turnover  
133 rate, while other classes were more stable across sessions ( $F(3,100) = 7.17$ ,  $p < 0.001$ , one-  
134 way ANOVA; Fig. 2F).

135 We found that total turnover dynamics reflect  $15.0\% \pm 2.0\%$  spine addition and  $13.0\% \pm$   
136  $1.9\%$  spine subtraction across consecutive days (Fig. 2H, I). We computed the survival fraction,

137 a measure indicating the fraction of spines still present from day one<sup>42-44</sup>. Although daily spine  
138 addition and subtraction was 15.0% in our original analysis (Fig. 2H, I), the survival fraction  
139 curve yields a more conservative estimate of turnover dynamics. Across 10 days, we found a  
140 23.5% net loss in original spines (Fig. 2G), indicating that most spine turnover takes place within  
141 an isolated population of transient spines. Both our cumulative turnover and survival fraction  
142 results were similar to previous findings from basal dendrites in CA1<sup>43,44</sup>, indicating that apical  
143 and basal dendrites exhibit similar spine dynamics. Although we only tracked spine turnover for  
144 up to 10 days, we found that we could identify the same dendritic processes over long time  
145 periods (up to 150 days; Fig. S3), allowing for long-term longitudinal experiments tracking  
146 isolated dendritic structures.

147

### 148 **Recording place and speed cells in CA1, CA3, and DG**

149 Much of the experimental work testing the hypothesized roles of CA1, CA3, and DG neurons  
150 has come from place cell (PC) recordings<sup>7-9,13,56,57</sup>. While the results of these studies have been  
151 instrumental, it has not been possible to measure activity throughout the transverse  
152 hippocampal circuit in the same animal. We therefore investigated the ability of our  
153 microperiscope to record from PCs in each of the hippocampal subfields during exploration of a  
154 spatial environment.

155 To measure functional responses, we implanted v2<sub>HPC</sub> microperiscopes in transgenic  
156 mice expressing GCaMP6s in glutamatergic neurons<sup>58,59</sup> (see Methods). As with the Thy1-GFP-  
157 M mice, we were able to image neurons from CA1-CA3, and DG in the same animal (Fig. 3A, B;  
158 Video S1). In some cases, depending on microperiscope placement, we were able to record  
159 from all three areas simultaneously (Fig. S4). In all HPC subfields, we found normal calcium  
160 dynamics with clear transients (Fig. 3C, D; Videos S2, S3). The imaging fields remained stable  
161 and the same field could be imaged over 100 days later (Fig. 3E). In addition, microperiscope  
162 implantation allowed measurement of neural responses from mossy cells in the dentate gyrus  
163 (Figs. S4, S5A) and, depending on prism placement, simultaneous imaging of deep-layer  
164 cortical neurons in parietal cortex (Fig. S5B).

165 As 2P microscopy generally requires the animal to be head-fixed, the behavioral assays  
166 used to probe PC activity are limited. Previous work has made use of virtual reality (VR)<sup>24,25</sup>,  
167 however it remains unclear how similar rodent hippocampal activity in real world environments  
168 is to that in VR<sup>60,61</sup>. To study PC activity in a physical environment, our head-fixed mice explored  
169 a carbon fiber arena that was lifted via an air table<sup>34</sup> (Fig. 4A; see Methods). The mice were thus  
170 able to navigate the physical chamber by controlling their movement relative to the floor.

171 Although this approach lacks the vestibular information present in real world navigation, it  
172 captures somatosensory and proprioceptive information missing from virtual environments.  
173 Moreover, recent work has found that place field width and single cell spatial information using  
174 this approach is comparable to the responses of free foraging animals<sup>35</sup>. For measurement of  
175 place fields, we allowed mice to navigate a curvilinear track over the course of 20-40 minutes  
176 (Video S4). As found previously<sup>35</sup>, using a curvilinear track allowed for robust sampling of the  
177 spatial environment and improved place field localization, though they could also be measured  
178 in the open field. In order to measure spatial properties of the hippocampal neurons  
179 independent of reward, we relied on exploration rather than active reward administration for  
180 sampling of the environment.

181 To characterize place fields, we recorded from neurons in CA1, CA3, and DG (CA1:  $n =$   
182 1026; CA3:  $n = 832$ ; and DG:  $n = 463$ ) in transgenic mice with panexcitatory expression of  
183 GCaMP6s (Fig. 4B;  $n = 8$  mice). We found PCs in all three subfields, with a distribution that was  
184 in general agreement with previous 2P imaging experiments<sup>19,24</sup> (Fig. 4C, F; CA1: 31.7%; CA3:  
185 24.5%; DG: 17.7%; see Methods) and with fields that spanned the entirety of the track (Fig. 4E).  
186 The spatial information and place field width of the CA1 place cells were similar to those found  
187 in a previous study using the same floating chamber design<sup>35</sup>. We found that spatial information  
188 was highest in CA1 (Fig. 4H; CA1:  $0.86 \pm 0.03$  bits/inferred spike; CA3:  $0.74 \pm 0.04$   
189 bits/inferred spike; DG:  $0.62 \pm 0.05$  bits/inferred spike; mean  $\pm$  s.e.m.) and that place field  
190 widths were comparable across the three regions (Fig. 4G; CA1:  $18.3 \pm 0.4$  cm; CA3:  $18.1 \pm$   
191  $0.5$  cm; DG:  $18.7 \pm 0.7$  cm; mean  $\pm$  s.e.m.). As cells responsive to speed have recently been  
192 found in the medial EC<sup>62,63</sup> and CA1<sup>63,64</sup>, we also identified neurons as speed cells (SCs) if their  
193 activity was significantly related to running speed<sup>62</sup> (see Methods). We found SCs in CA1, CA3,  
194 and DG, with all areas having cells that showed both increased and decreased activity with  
195 higher running speeds (Fig. 4D, F). Speed cells were most abundant in DG (Fig. 4F; CA1: 9.1%;  
196 CA3: 13.5%; DG: 30.2%), consistent with past work that found it was possible to decode the  
197 speed of freely moving animals from the activity of DG, but not CA1<sup>57</sup>.

198

### 199 **Distribution of PC properties along the DG-to-CA1 axis**

200 Recent work has suggested that PC properties are heterogeneously distributed along the extent  
201 of the DG-to-CA1 axis. In particular, place field width and spatial information have been found to  
202 vary among different subregions of CA3, with dorsal CA3 (dCA3)/CA2 having lower spatial  
203 information and larger place fields than medial CA3 (mCA3)<sup>36-38</sup>, and proximal CA3 having  
204 values that were most similar to DG<sup>13</sup>. Such distributions could be supported by known

205 anatomical gradients in connectivity of CA3<sup>65-69</sup>. However, given that these studies required  
206 separate animals for the recording of each location along the DG-to-CA1 axis, and that  
207 electrophysiology has limited spatial resolution along the transverse axis, we used the  
208 microperiscopes to measure these properties throughout the DG-to-CA1 axis in the same mice.

209 Using the v2<sub>HPC</sub> microperiscope, we simultaneously imaged from several hundred cells  
210 (range: 270-292 neurons) extending from pCA3 to pCA1 (Fig. 5A). Recordings from distinct  
211 imaging planes in different mice ( $n = 3$ ) were compared by calculating the distance of individual  
212 cells from the inflection point of the DG-to-CA1 transverse axis (Fig; 5A; see Methods). In  
213 agreement with previous studies<sup>36-38</sup>, we found a non-uniform distribution of spatial information  
214 along this axis (Fig. 5B, C;  $F(6, 801) = 2.67$ ,  $p = 0.01$ , General Linear F-test against a flat  
215 distribution with the same mean). In particular, we found that pCA3 cells had spatial information  
216 that was closer in value to those in DG (Fig. 5C; Fig. 4H), and that mCA3 had spatial  
217 information that was greater than dCA3/CA2 (Fig. 5B, C). We found that place field widths were  
218 smallest in mCA3, and largest in dCA3/CA2, although we failed to find a statistically significant  
219 non-uniform distribution with respect to place field width across the extent of the DG-to-CA1 axis  
220 (Fig. S6;  $F(4, 221) = 1.61$ ,  $p = 0.17$ , General Linear F-test against a flat distribution with the  
221 same mean).

222

## 223 **DISCUSSION**

224 The microperiscope hippocampal imaging procedure we developed allows researchers, for the  
225 first time, to chronically image neuronal structure and functional activity throughout the  
226 transverse hippocampal circuit in awake, behaving mice. This approach builds on microprism  
227 procedures developed for imaging cortex<sup>30-32</sup>, allowing multiple hippocampal subfields in the  
228 same animal to be accessed optically. Using the microperiscope, we were able to resolve  
229 spines on the apical dendrites of CA1 pyramidal cells and track them across time. Additionally,  
230 we were able to characterize place cells (PCs) and speed cells (SCs) in all three hippocampal  
231 subfields, and investigate their anatomical distribution across subfields.

232

### 233 **Comparison to other methods**

234 Historically, electrophysiology has been the principal tool used to study the hippocampus.  
235 Electrophysiological recordings have much higher temporal resolution than calcium imaging and  
236 can directly measure spikes, but have limited spatial resolution. Our approach allows large scale  
237 imaging of neurons across multiple hippocampal subfields, with known spatial and  
238 morphological relationships. In addition, our approach allows genetically-controlled labeling of

239 particular cell types, imaging of cellular structures such as dendrites and spines, and  
240 unequivocal tracking of functional and structural properties of the same cells across time, none  
241 of which are possible with existing electrophysiological approaches.

242 Several approaches making use of optical imaging have been developed for use in the  
243 hippocampus. These include gradient index (GRIN) lenses<sup>70,71</sup>, and cannulas that can be  
244 combined with both one-photon (1P) head-mounted microendoscopes<sup>26-28</sup> and 2P  
245 imaging<sup>24,25,29</sup>. These methods have been limited to horizontal imaging planes, making it difficult  
246 to image CA3 and DG, and intractable to image all three subfields in the same animal. While all  
247 of these methods cause damage to the brain, and some require the aspiration of the overlying  
248 cortex, the damage is largely restricted to superficial hippocampus. This contrasts with the  
249 implantation of our microperiscope, which is inserted into the septal end of the hippocampus  
250 and necessarily causes some damage to the structure. Despite this, we find normal response  
251 properties, including selectivity for location and speed, in CA1-CA3 and DG (Fig. 4). Damage in  
252 the direction orthogonal to the transverse axis caused by the implantation of the microperiscope  
253 is similar to that caused by microprisms in cortex<sup>31</sup>, as glial markers were found to decay to  
254 baseline levels 300-400  $\mu\text{m}$  away from the face of the microperiscope. We showed that,  
255 following successful implantation, the imaging fields were stable and the same cells could be  
256 imaged up to 3 months later (Fig. 3C). However, we emphasize that tissue damage caused by  
257 the microperiscope assembly to the hippocampus should be taken into consideration when  
258 planning experiments and interpreting results.

259

## 260 **Structural and functional properties along the transverse hippocampal circuit**

261 We utilized the microperiscope in two experiments that would not have been possible with  
262 existing methods: (1) we tracked the spines on apical CA1 dendrites *in vivo* (Fig. 2); (2) we  
263 simultaneously recorded from PCs along the extent of the DG-to-CA1 transverse axis (Fig. 5).

264 Several studies have tracked the spines of basal CA1 dendrites *in vivo* by imaging the  
265 dorsal surface of the hippocampus<sup>43,44</sup>. However, spines on the apical dendrites have not been  
266 tracked *in vivo*. Given that these spines make up the majority of the input to CA1 pyramidal  
267 neurons, there is a significant need for understanding their dynamics. Using the microperiscope,  
268 we tracked isolated apical dendrites for up to 10 consecutive days (Fig. 2D). We found  
269 moderate addition and subtraction across days, indicating dynamic turnover in apical dendrites  
270 (Fig 2H, I). However, consistent with previous studies in basal spines<sup>43,44</sup>, we found the majority  
271 of spines (76.5%) survived throughout the imaging period (Fig. 2G). This high survival fraction  
272 suggests that the cumulative turnover rates we observe are reflective of a distinct pool of

273 transient spines, while the majority of spines remain stable across days over a longer timescale.  
274 These results add to the growing notion that, even in the absence of salient learning and reward  
275 signals, dendritic spines are dynamic structures<sup>43,72,73</sup>. Understanding the nature and timescales  
276 of these dynamics has significant implications for the reported instability of PCs<sup>23,24,27,74–76</sup>.

277 Previous studies have found gradients of connectivity in CA3<sup>65–69</sup>, suggesting that there  
278 may be functional gradients as well. Electrophysiological recordings have indeed found that  
279 spatial information and place field width vary as a function of distance along the DG-to-CA1  
280 axis<sup>36–38</sup>, and that the most proximal part of CA3 is functionally more similar to DG than to the  
281 rest of CA3<sup>13</sup>. This has led to a more nuanced understanding of the hippocampal circuit, with  
282 coarse anatomical subdivisions having finer functional subdivisions. However, given that these  
283 previous studies relied on recordings in different animals for each location along the DG-to-CA1  
284 axis, and given electrodes' poor spatial resolution in the transverse axis, the results have had to  
285 be cautiously interpreted. Using the microperiscope, we imaged several hundred neurons in  
286 multiple mice along the extent of the DG-to-CA1 axis (Fig. 5A). The location of each neuron  
287 relative to the CA3 inflection point could be easily identified, allowing for unequivocal  
288 characterization of spatial information and place field width along the DG-to-CA1 axis across  
289 several mice (Fig. 5B, C; Fig. S6). Similar to the previous studies<sup>36–38</sup>, we found a non-uniform  
290 distribution of spatial information (Fig. 5B, C). Place field width also appeared to vary along the  
291 DG-to-CA1 axis, though we failed to find statistically significant non-uniformity with respect to  
292 place field width (Fig. S6B). Indeed, we found that spatial information, but not place field width,  
293 differed significantly between CA1, CA3, and DG (Fig. 4H). Given the high spatial resolution and  
294 ability to simultaneously record from cells across the DG-to-CA1 axis using this approach, our  
295 results strengthen the hypothesis of distributed spatial coding across hippocampal subfields.

296

## 297 **Future applications**

298 This paper explored a few possible uses for the microperiscope in interrogating the hippocampal  
299 circuit. However, there are a number of candidate applications we did not pursue in this  
300 manuscript that could reveal novel insight into hippocampal function. Here, we describe several  
301 potential applications: (1) The microperiscope allows for the recording from multiple  
302 hippocampal subfields simultaneously (Fig. S4), allowing investigation of interactions between  
303 neurons in different subfields during behavior. This could also be useful for determining the  
304 effect of neuron- or subfield-specific optogenetic manipulations on downstream subfields. (2)  
305 The microperiscope enables the investigation of local circuits by allowing morphological and  
306 genetic identification of different cell types. This includes identifying genetically-distinct



307 hippocampal neurons (e.g. CA2 neurons, specific interneuron subtypes) as well as identifying  
308 particular cell types by position or morphological characteristics (e.g. mossy cells in DG; Fig.  
309 S5A). As these distinct cell types play important roles in hippocampal function<sup>20,77-81</sup>, having  
310 access to them will enable a greater understanding of the hippocampal circuit. (3) The  
311 microperiscope can be combined with retrograde-transported viruses to allow projection-based  
312 cell identification, making it possible to identify neurons that project to specific downstream  
313 targets. Since hippocampal neurons that project to different brain regions have been found to  
314 exhibit distinct functional properties (e.g. neurons in ventral CA1 that project to the nucleus  
315 accumbens shell have been implicated in social memory<sup>21</sup>), the union of these tools will be a  
316 powerful means for understanding hippocampal outputs. (4) Finally, the microperiscope  
317 provides access to the entire dendritic tree of pyramidal neurons (Figs. 1C, 2A, 4B; Video S2),  
318 giving optical access to dendritic signaling over a much larger spatial extent than has been  
319 previously possible<sup>82-84</sup>. By sparsely expressing calcium or glutamate sensors in hippocampal  
320 pyramidal neurons, spines throughout the somatodendritic axis could be imaged, allowing  
321 determination of how place field responses arise from the responses of individual spines, similar  
322 to experiments in visual cortex investigating the cellular origin of orientation tuning from synaptic  
323 inputs<sup>85,86</sup>.

324 Combined with electrophysiological and traditional imaging approaches, imaging of the  
325 transverse hippocampal circuit with microperiscopes will be a powerful tool for investigating  
326 hippocampal circuitry, structural dynamics, and function.





**Figure 1. Implanted microperiscopes allow imaging of the hippocampal transverse plane.**

- (A) Three-dimensional schematic<sup>87</sup> illustrating microperiscope implantation and light path for hippocampal imaging.
- (B) Schematics<sup>88</sup> showing the imaging plane location of v1<sub>CA1</sub> (1 mm imaging plane, 2 mm total length) and v2<sub>HPC</sub> (1.5 mm imaging plane, 2.5 mm total length) microperiscopes.
- (C) Tiled average projection of the transverse imaging plane using the v2<sub>HPC</sub> microperiscope implant in a Thy1-GFP-M transgenic mouse. Scale bar = 100  $\mu\text{m}$ .
- (D) Enlarged images of hippocampal subfields (CA1, CA3, DG) corresponding to the rectangles in (C). Scale bar = 50  $\mu\text{m}$ .
- (E) Example histological section stained for microglia (S100 - red) and astrocytes (GFAP - green). Scale bar = 300  $\mu\text{m}$ .
- (F) Quantification of microglia and astrocyte density as a function of distance from the prism face, normalized to the density in the unimplanted contralateral hemisphere ( $n = 2$  mice; mean  $\pm$  bootstrapped s.e.m.).

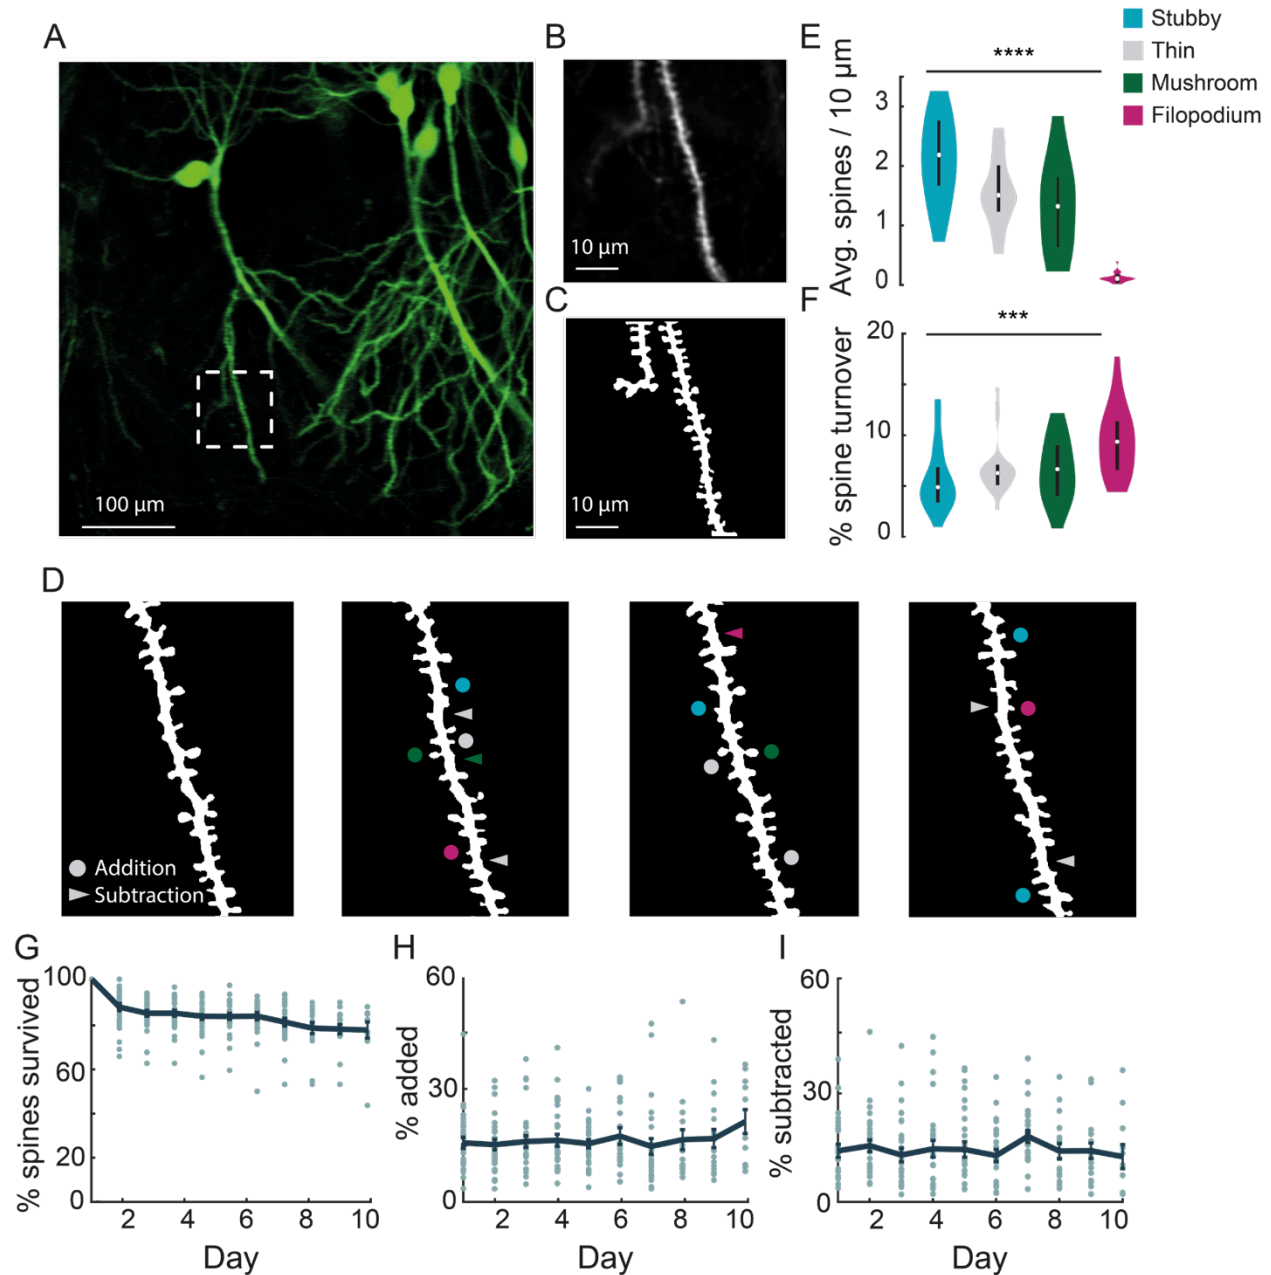

**Figure 2. Chronic imaging of spine morphology in CA1 apical dendrites.**

(A) Average projection of CA1 neurons sparsely expressing a GFP reporter (Thy1-GFP-M) imaged through the  $v1_{CA1}$  microperiscope. Scale bar = 100  $\mu\text{m}$ .

(B) Weighted projection (see Methods) of the apical dendrites shown in the dashed box of (A). Scale bar = 10  $\mu\text{m}$ .

(C) Filtered and binarized image (Figure S2A; see Methods) of the dendrites in (B) to allow identification and classification of individual dendritic spines. Scale bar = 10  $\mu\text{m}$ .

(D) Tracking CA1 dendritic spines over consecutive days on a single apical dendrite.

Arrowheads indicate subtracted spines and circles indicate added spines. Colors indicate spine type of added and subtracted spines: filopodium (magenta), thin (grey), stubby (blue), and mushroom (green).

(E) Average number of spines per 10  $\mu\text{m}$  section of dendrite, for each of the four classes of spine ( $n = 26$  dendrites from 7 mice). one-way ANOVA,  $F(3,100) = 51.47$ , \*\*\*\* $p < 0.0001$

(F) Percent spine turnover across days in each spine type ( $n = 26$  dendrites from 7 mice). one-way ANOVA,  $F(3,100) = 7.17$ , \*\*\* $p < 0.001$ .

(G) Spine survival fraction across processes ( $n = 26$  dendrites from 7 mice) recorded over 10 consecutive days.

(H) Percent of spines added between days over 10 days of consecutive imaging.

(I) Percent of spines subtracted between days over 10 days of consecutive imaging.

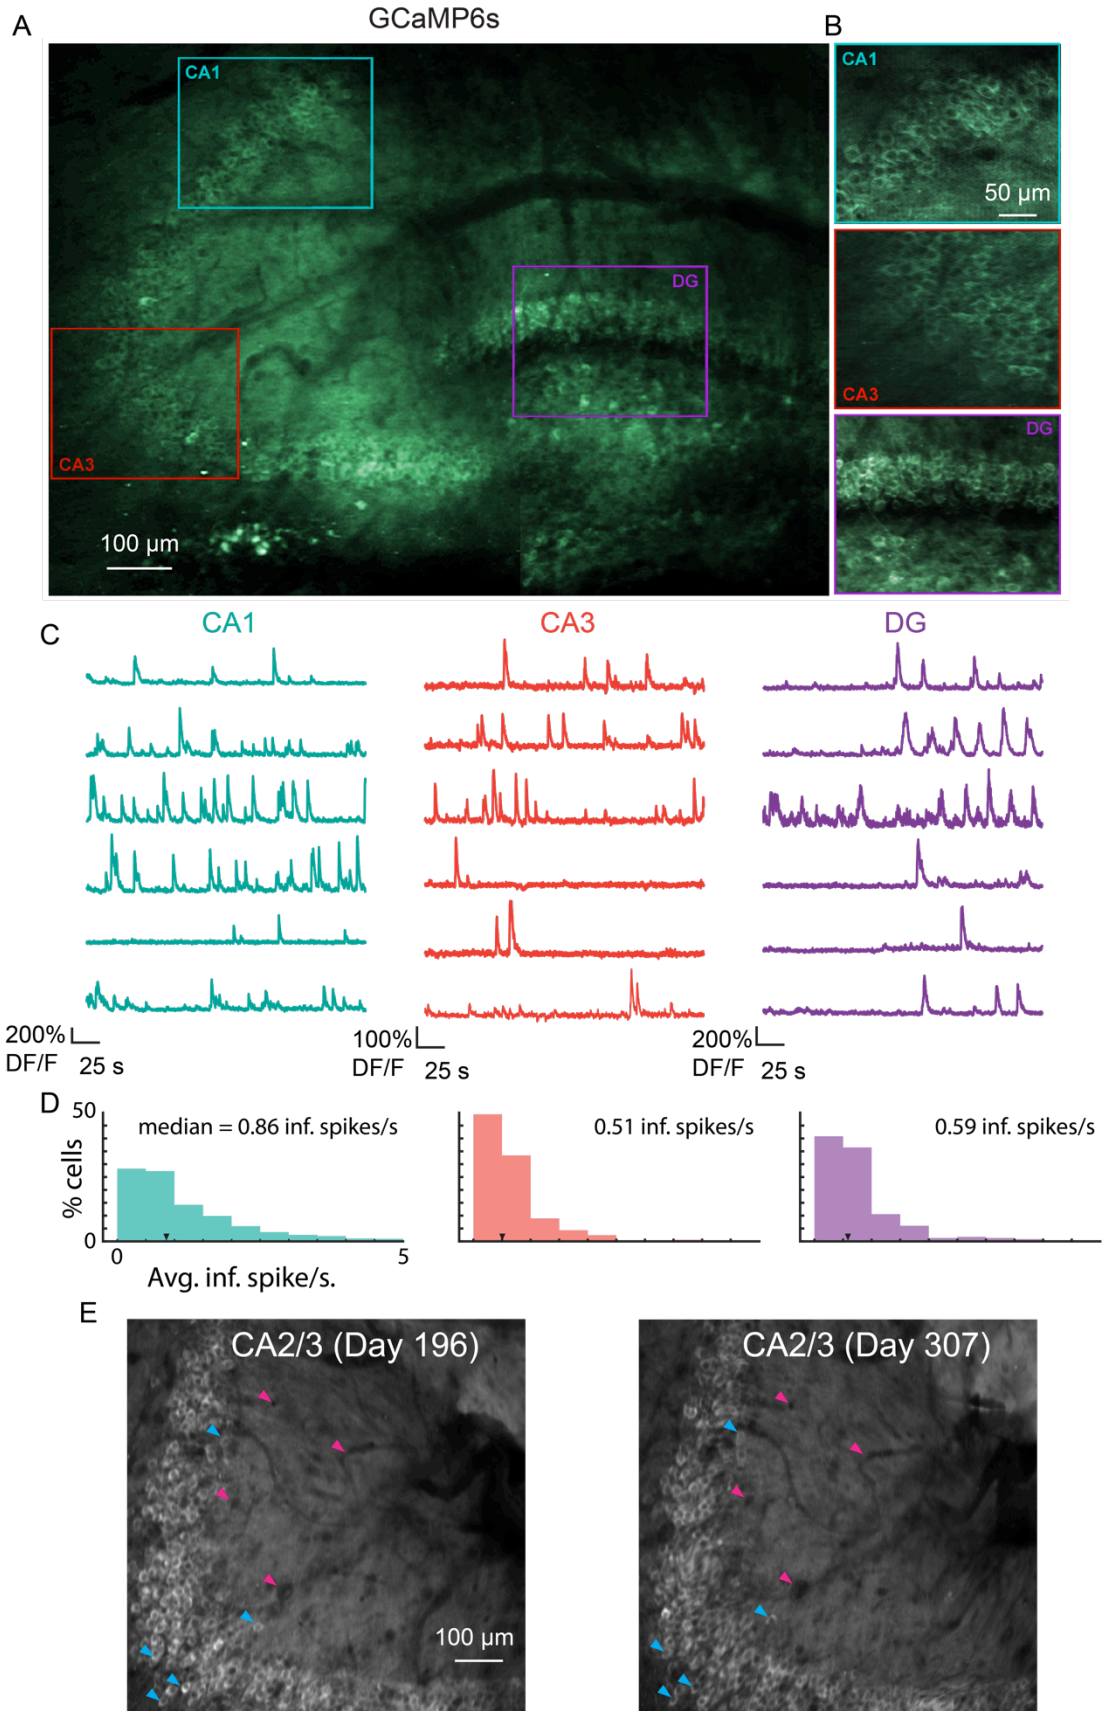

**Figure 3. Microperiscope imaging of calcium dynamics across subfields in awake mice.**

- (A) Example tiled image (as in Fig. 1C) for a single panexcitatory transgenic GCaMP6s mouse (Slc17a7-GCaMP6s). Scale bar = 100  $\mu\text{m}$ .
- (B) Enlarged images of each hippocampal subfield (CA1, CA3, DG) corresponding to the rectangles in (A). Scale bar = 50  $\mu\text{m}$ .
- (C) Example GCaMP6s normalized fluorescence time courses (% DF/F) for identified cells in each subfield.
- (D) Distribution of average inferred spiking rate during running for each hippocampal subfield (CA1, CA3, DG). Median is marked by black arrowhead.
- (E) Example average projection of CA2/3 imaging plane 196 days post implantation (left) and 111 days later. Image was aligned using non-rigid registration (see Methods) to account for small tissue movements. Magenta arrowheads mark example vasculature and blue arrowheads mark example neurons that are visible in both images. Scale bar = 100  $\mu\text{m}$ .



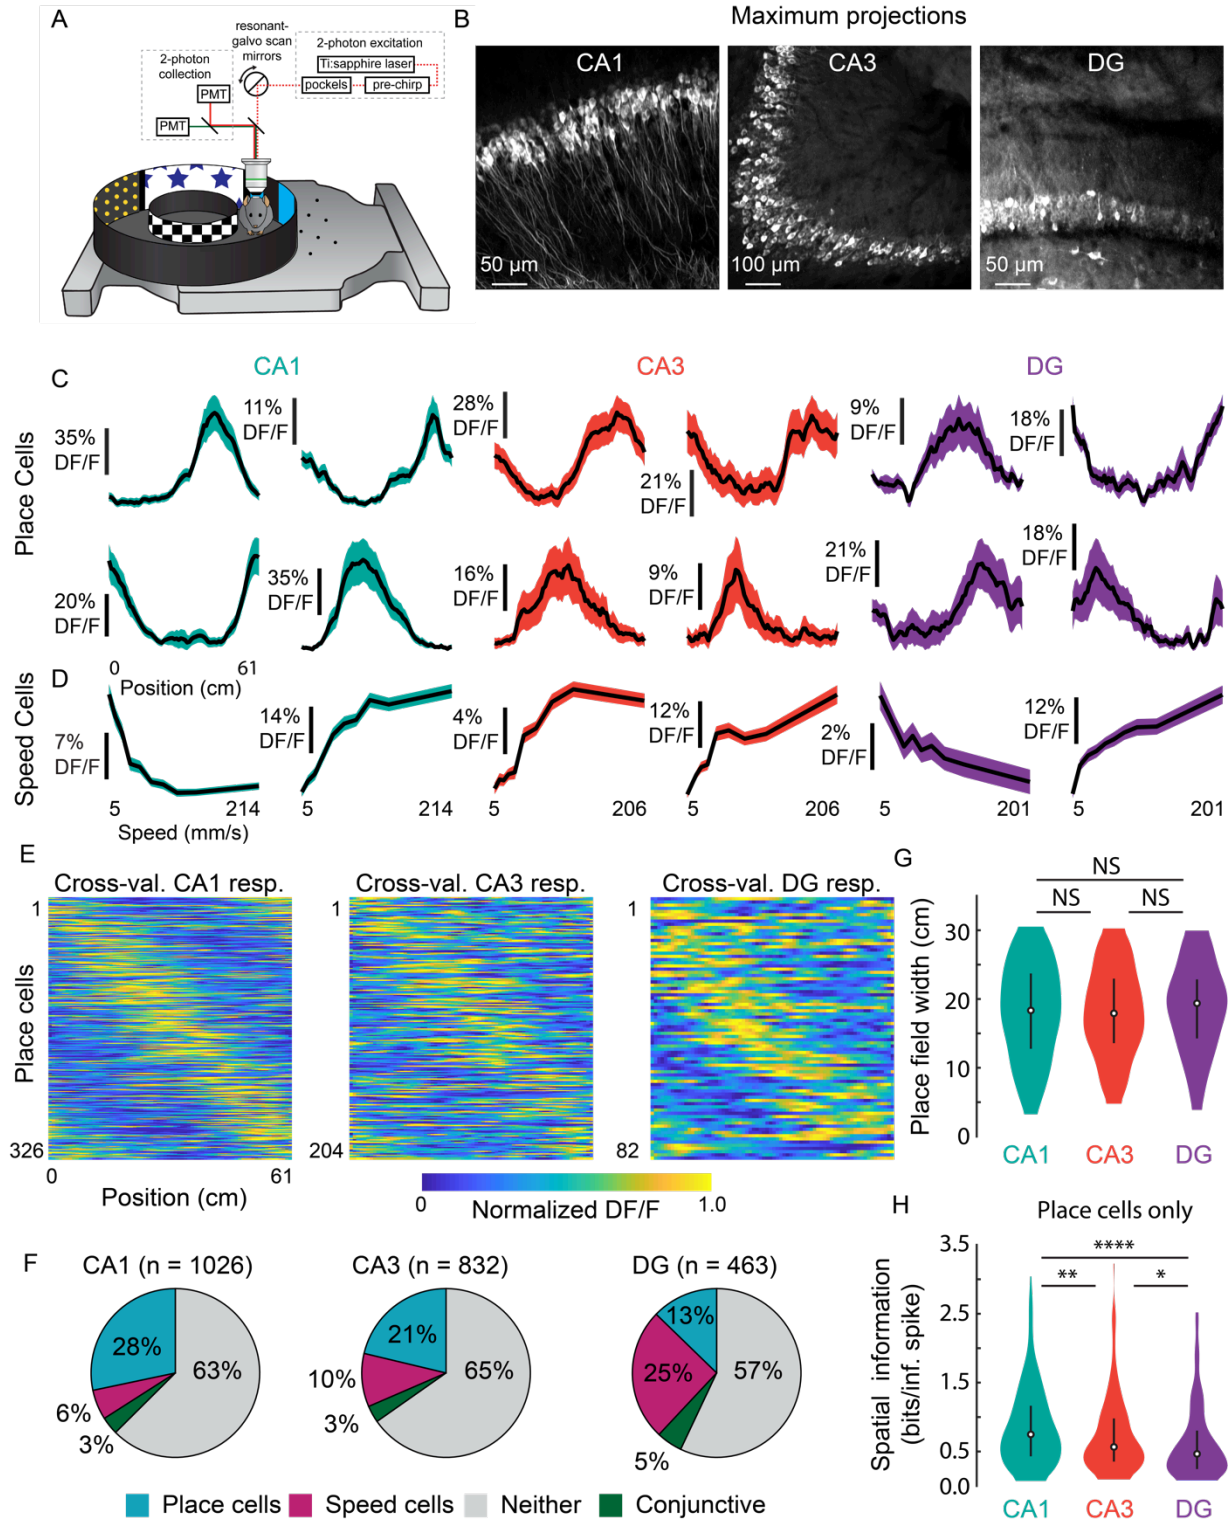



#### Figure 4. Prevalence of place and speed cells across hippocampal subfields.

- (A) Schematic of air-lifted carbon fiber circular track (250 mm outer diameter) that the mice explored during imaging (Video S4). Four sections of matched visual cues lined the inner and outer walls.
- (B) Example maximum projections of GCaMP6s-expressing neurons in each subfield. Scale bar = 50, 100, 50  $\mu\text{m}$  respectively.
- (C) Plots of mean normalized calcium response (% DF/F) versus position along the circular track for four identified place cells (PCs) in each subfield. Shaded area is s.e.m.
- (D) Plots of mean calcium response (% DF/F) versus speed along the circular track for two identified speed cells (SCs) in each subfield. Shaded area is s.e.m.
- (E) Cross-validated average responses (normalized DF/F) of all PCs found in each subfield, sorted by the location of their maximum activity. Responses are plotted for even trials based on peak position determined on odd trials to avoid spurious alignment.
- (F) Distribution of cells that were identified as PCs, SCs, conjunctive PC+SCs, and non-coding in each subfield.
- (G) Distribution of place field width for all place cells in each subfield. Error bars indicate the interquartile range (75th percentile minus 25th percentile). Two-sample Kolmogorov-Smirnov test: CA1-CA3,  $p = 0.47$ ; CA3-DG,  $p = 0.21$ ; CA1-DG,  $p = 0.58$ . NS, not significant ( $p > 0.05$ ).
- (H) Distribution of spatial information (bits per event) for all place cells in each subfield. Error bars are the same as in (G). Two-sample Kolmogorov-Smirnov test: CA1-CA3,  $p = 0.0087$ ; CA3-DG,  $p = 0.04$ ; CA1-DG,  $p = 7.6 \times 10^{-5}$ . \* $p < 0.05$ , \*\* $p < 0.01$ , \*\*\*\* $p < 0.0001$ .

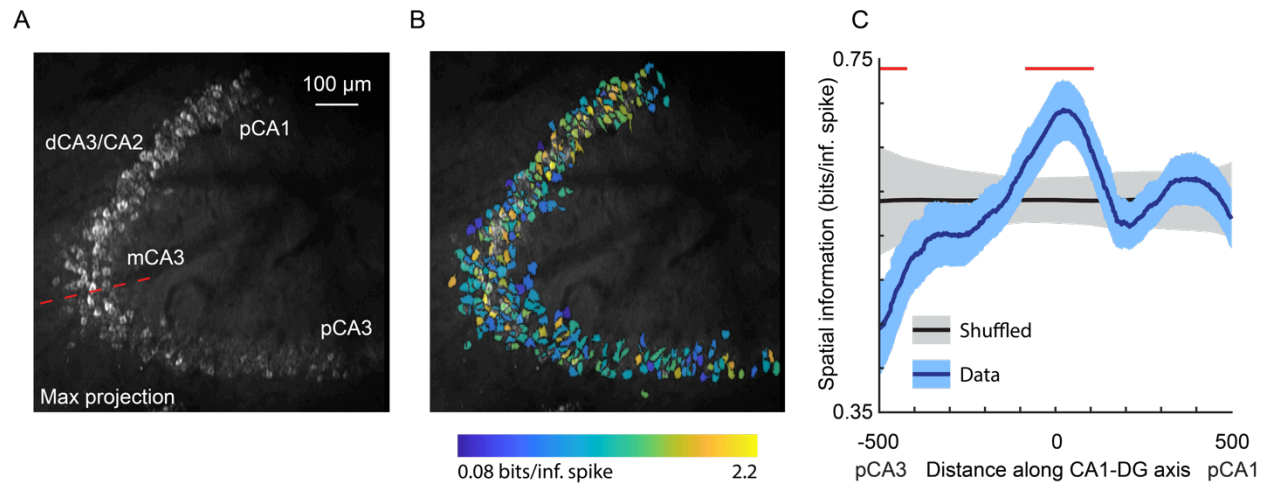

**Figure 5. Spatial selectivity of neurons varies along the DG-to-CA1 axis.**

- (A) Maximum projection of an example DG-to-CA1 axis recording. Approximate locations of CA3 and CA1 subfields are labeled. Inflection point labeled with red line. Scale bar = 100  $\mu\text{m}$ .
- (B) Spatial information (bits/inferred spike) pseudo-colored on a logarithmic scale, for each neuron overlaid on the maximum projection in (A).
- (C) Spatial information, as a function of distance along the DG-to-CA1 axis (pCA3 to dCA1), of real data (blue) vs. shuffled control (black). Shaded area is bootstrapped s.e.m. Red lines indicate values that are outside the shuffled distribution ( $p < 0.05$ ). A general linear F-test revealed significant non-uniformity ( $n = 3$  fields from 3 mice;  $F(6, 801) = 2.67$ ,  $p = 0.01$ ).

## SUPPLEMENTAL FIGURES

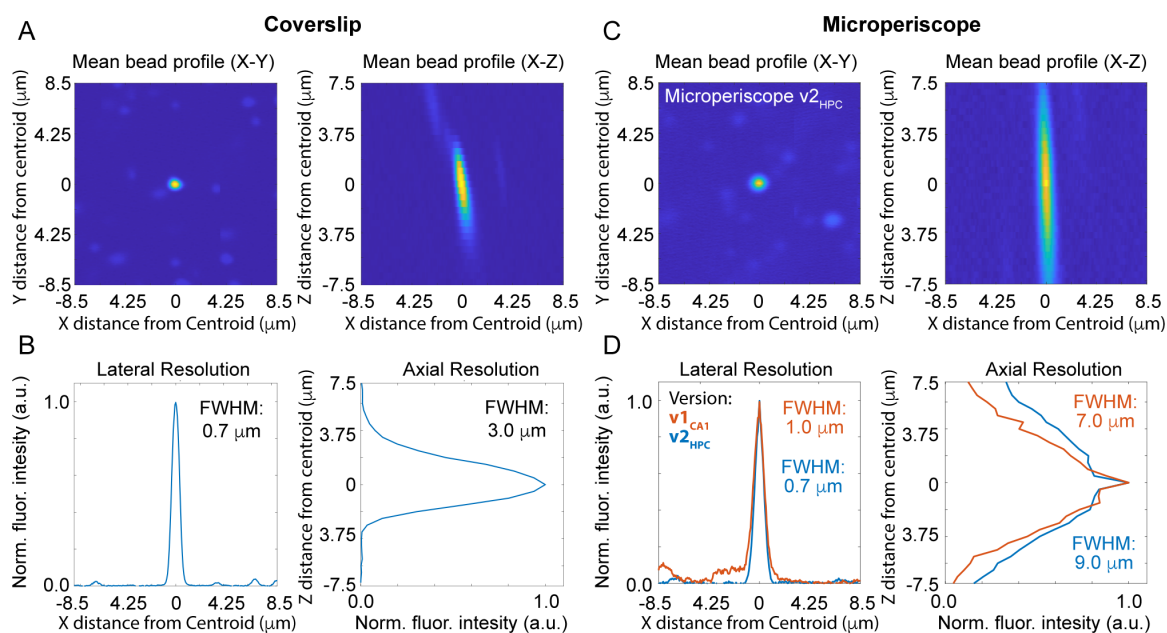

**Figure S1: Lateral and axial resolution of cranial window and microperiscopes.**

- (A) Average X-Y profile (left) and X-Z profile (right) of  $0.1 \mu\text{m}$  fluorescent microspheres ( $n = 17$  microspheres) embedded in agar under a single glass coverslip ( $0.15 \text{ mm}$  thickness), imaged with a  $16\times/0.8\text{NA}$  Nikon objective.
- (B) Plot of normalized fluorescence intensity profile of X dimension (lateral resolution; FWHM =  $0.7 \mu\text{m}$ ) and Z dimension (axial resolution; FWHM =  $3.0 \mu\text{m}$ ) through the centroid of the microsphere ( $n = 17$  microspheres).
- (C) Average X-Y profile (left) and X-Z profile (right) of  $0.1 \mu\text{m}$  fluorescent microspheres ( $n = 20$  microspheres) imaged through the  $v2_{\text{HPC}}$  microprism ( $2.5 \text{ mm}$  path length through glass) with a  $16\times/0.8\text{NA}$  Nikon objective.
- (D) Plot of normalized fluorescence intensity profile of X dimension (lateral resolution;  $v1_{\text{CA1}}$  FWHM =  $1.0 \mu\text{m}$ ;  $v2_{\text{HPC}}$  FWHM =  $0.7 \mu\text{m}$ ) and Z dimension (axial resolution;  $v1_{\text{CA1}}$  FWHM =  $7.0 \mu\text{m}$ ;  $v2_{\text{HPC}}$  FWHM =  $9.0 \mu\text{m}$ ) through the centroid of the microsphere ( $n = 10$  microspheres for  $v1_{\text{CA1}}$ ,  $n = 20$  microspheres for  $v2_{\text{HPC}}$ ).

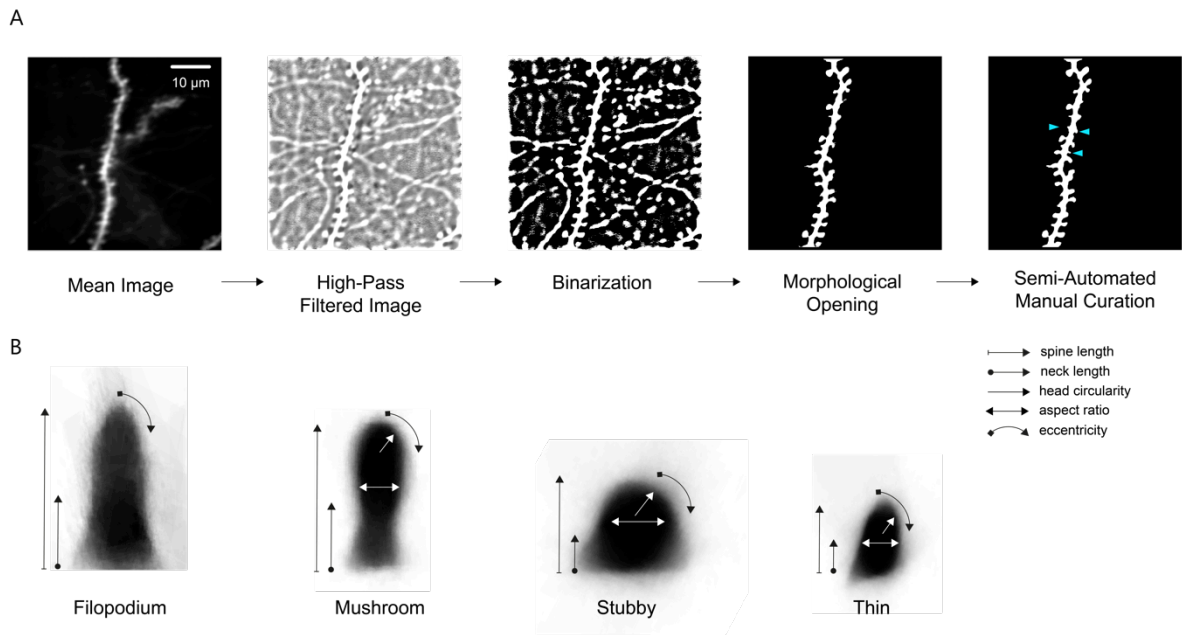

**Figure S2: Dendritic morphology image processing pipeline and spine classification.**

(A) Steps in dendritic morphology image processing pipeline (see Methods). Weighted mean image is obtained by acquiring average projections from 4 planes spaced by 3  $\mu\text{m}$  and weighting the images around the brightest part of the dendrite. Next, the mean image is high-pass filtered to reveal fine structures. The image is then binarized using a global threshold, to filter out less prominent dendrites. Morphological opening is applied to remove any elements of the high-pass filtered image that survive the binarization process that are too small to be the principal dendrite. A semi-automated manual curation process is then used to add back any individual spines that were lost during binarization and remove any unwanted dendritic segments. Cyan arrowheads indicate manually added spines. To isolate the spines, the image is skeletonized and structures that protruded laterally from the dendritic shaft and had a total area of  $>1 \mu\text{m}^2$  were identified as spines. Scale bar = 10  $\mu\text{m}$ .

(B) Mean profile of all filopodium, mushroom, stubby, and thin spines ( $n = 47, 431, 695,$  and  $495,$  respectively), computed by averaging across the registered spines of each morphological classification. Spines were classified according to spine length, neck length, neck width, head circularity, and eccentricity (see Methods).

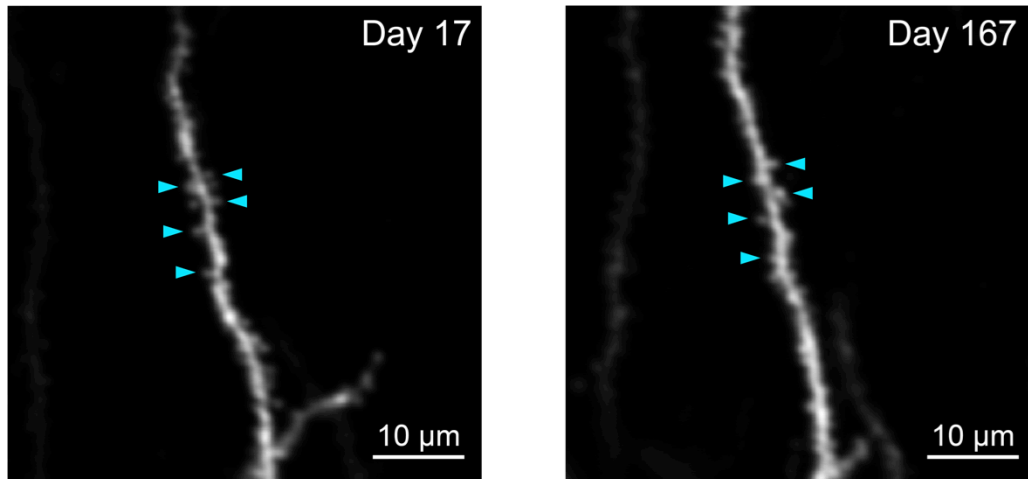

**Figure S3: Long-term imaging of the same dendrite.**

Weighted average projection of the same dendritic process 150 days apart. Spines present at both time points indicated by cyan arrowheads. Scale bar = 10  $\mu\text{m}$ .

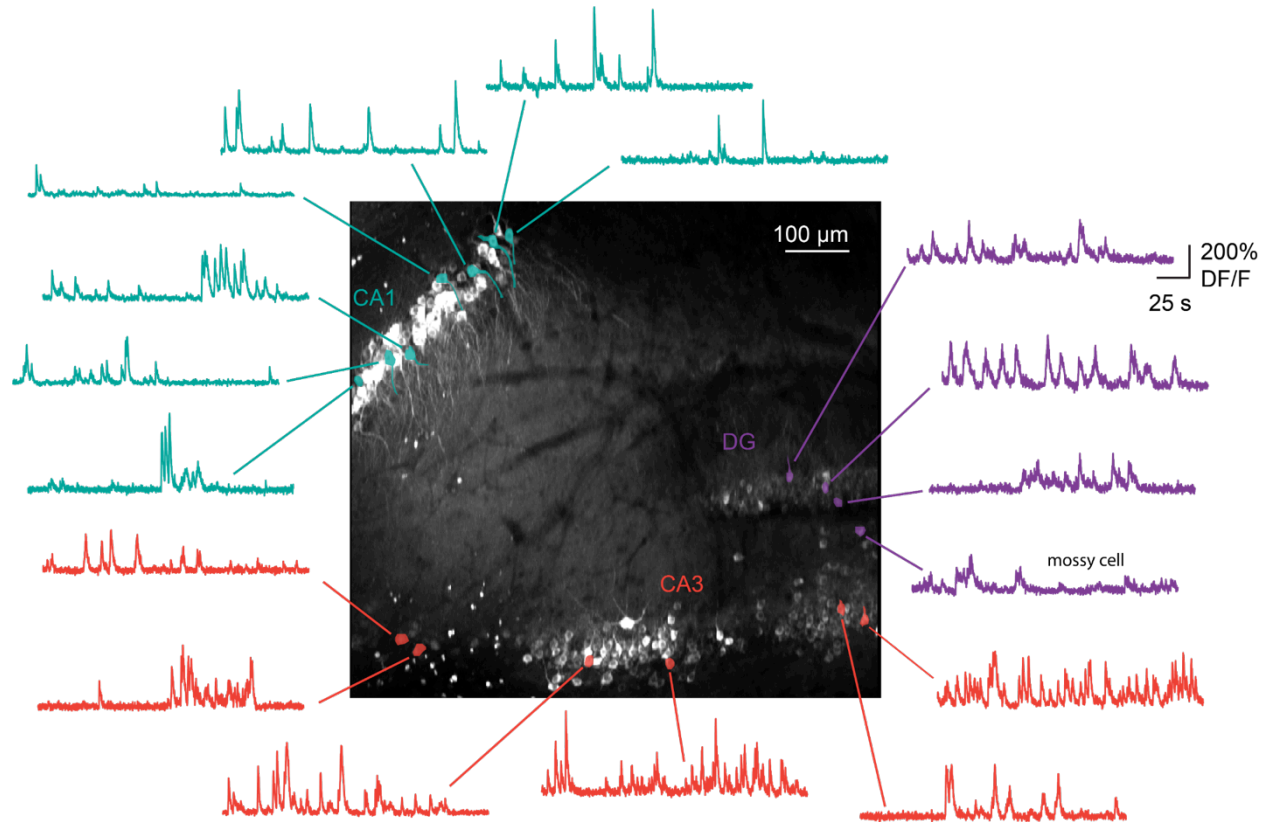

**Figure S4. Simultaneous imaging of all three hippocampal subfields.**

Maximum projection, and example GCaMP6s fluorescence time courses for identified cells, from a recording in which CA1 ( $n = 55$  cells), CA3 ( $n = 158$ ), and DG ( $n = 28$ ) were simultaneously recorded from the same image plane. Scale bar = 100 μm.

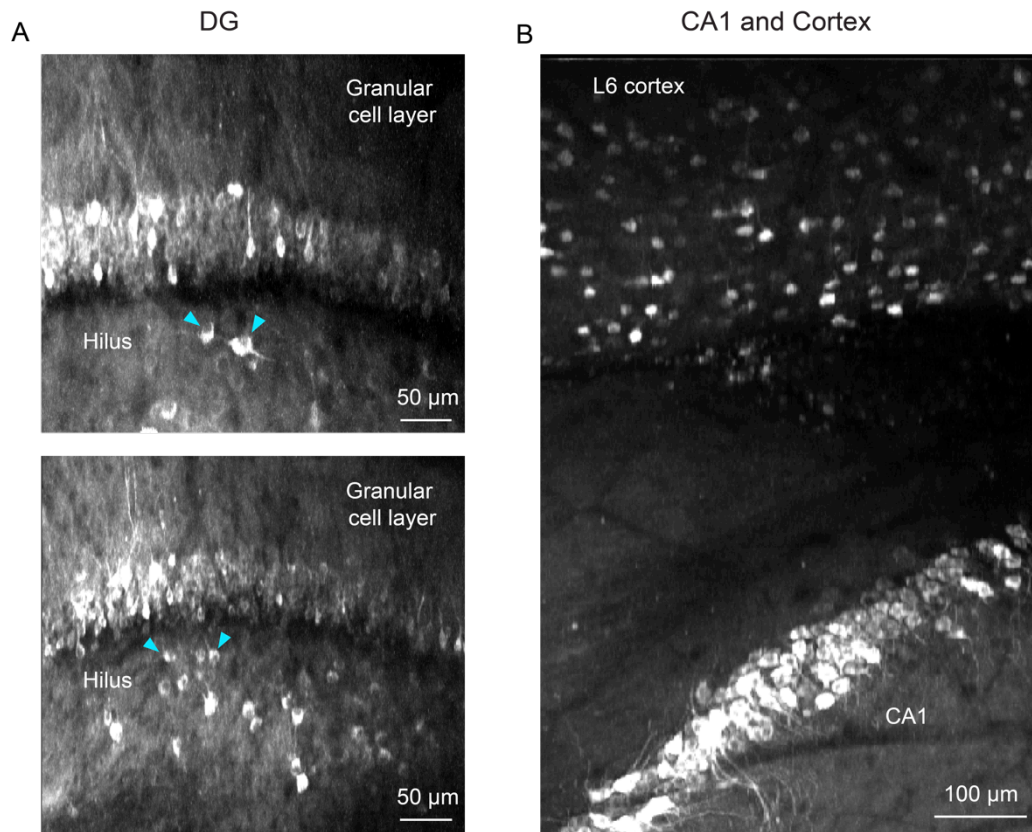

**Figure S5. Additional applications for microperiscope imaging.**

(A) Two maximum projections of imaging planes in which both the granular cell layer and the hilus in the DG could be imaged simultaneously. Example putative mossy cells indicated with cyan arrowheads. Scale bar = 50  $\mu\text{m}$ .

(B) Maximum projection from an imaging session in which both CA1 and L6 of the neocortex are visible, allowing simultaneous imaging of neurons in CA1 and deep layers of the parietal cortex. Scale bar = 100  $\mu\text{m}$ .



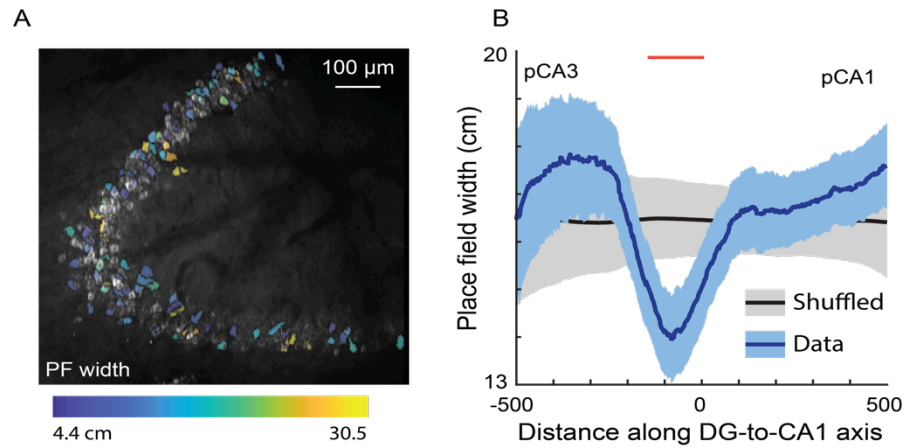

**Figure S6. Place field width along the DG-to-CA1 axis.**

- (A) Place field width pseudo-colored for each place cell overlaid on the maximum projection from Fig. 5A. Any cell that was not a place cell is not pseudo-colored. Scale bar = 100 μm.
- (B) Place field width, as a function of distance along the DG-to-CA1 axis (pCA3 to pCA1), of real data (blue) vs. shuffled control (black). Shaded area is s.e.m. Red lines indicate individual positions with place field values that were outside of the shuffled distribution ( $p < 0.05$ ). However, a General Linear F-test revealed no significant non-uniformity:  $F(4, 221) = 1.61, p = 0.17$ .

## SUPPLEMENTAL VIDEOS

**Video S1.** Demonstration of two-photon imaging of a Slc17a7-GCaMP6s mouse through the microperiscope. Recording starts in the superficial cortex in front of microperiscope, then moves through the microperiscope to the hippocampus, zooming in on subfields CA1, CA3, and DG.

**Video S2.** Calcium activity in subfield CA1 in a Slc17a7-GCaMP6s mouse imaged through the microperiscope.

**Video S3.** Calcium activity in subfield DG in a Slc17a7-GCaMP6s mouse imaged through the microperiscope.

**Video S4.** Mouse running in the floating chamber circular track. Ambient light is higher than usual levels for improved video quality.

## 327 **METHODS**

### 328 **Animals**

329 For dendritic morphology experiments, Thy1-GFP-M (Jax Stock #007788) transgenic mice ( $n =$   
330 7) were used for sparse expression of GFP throughout the forebrain. For forebrain-wide calcium  
331 indicator expression, Emx1-IRES-Cre (Jax Stock #005628) x ROSA-LNL-tTA (Jax Stock  
332 #011008) x TITL-GCaMP6s (Jax Stock #024104) triple transgenic mice ( $n = 2$ ) or Slc17a7-  
333 IRES2-Cre (Jax Stock #023527) x TITL2-GC6s-ICL-TTA2 (Jax Stock #031562) double  
334 transgenic mice ( $n = 6$ ) were bred to express GCaMP6s in excitatory neurons. For imaging  
335 experiments, 8-51 week old (median 17 weeks) mice of both sexes (6 males and 9 females)  
336 were implanted with a head plate and cranial window and imaged starting 2 weeks after  
337 recovery from surgical procedures and up to 10 months after microperiscope implantation. The  
338 animals were housed on a 12 hr light/dark cycle in cages of up to 5 animals before the implants,  
339 and individually after the implants. All animal procedures were approved by the Institutional  
340 Animal Care and Use Committee at University of California, Santa Barbara.

341

### 342 **Surgical Procedures**

343 All surgeries were conducted under isoflurane anesthesia (3.5% induction, 1.5 - 2.5%  
344 maintenance). Prior to incision, the scalp was infiltrated with lidocaine (5 mg kg<sup>-1</sup>,  
345 subcutaneous) for analgesia and meloxicam (2 mg kg<sup>-1</sup>, subcutaneous) was administered  
346 preoperatively to reduce inflammation. Once anesthetized, the scalp overlying the dorsal skull  
347 was sanitized and removed. The periosteum was removed with a scalpel and the skull was  
348 abraded with a drill burr to improve adhesion of dental acrylic.

349 For hippocampal imaging, we used two types of custom-designed glass microperiscope  
350 (Tower Optical). The first ( $v1_{CA1}$ ), for imaging the upper part of the hippocampus (CA1/CA2)  
351 consisted of a 1 x 1 x 1 mm square base and a 1 mm right angle prism, for a total length of 2  
352 mm on the longest side (Fig. 1B, left). The second ( $v2_{HPC}$ ), for imaging the entire transverse  
353 circuit (CA1-3, DG) had a 1.5 x 1.5 x 1.0 mm (L x W x H) square base and a 1.5 mm right angle  
354 prism, for a total length of 2.5 mm on the longest side (Fig. 1B, right). The hypotenuse of the  
355 right angle prisms were coated with enhanced aluminum for internal reflectance. The  
356 microprism was attached to a 5 mm diameter coverglass (Warner Instruments) with a UV-cured  
357 optical adhesive (Norland, NOA61). Prior to implantation, the skull was soaked in sterile saline  
358 and the cortical vasculature was inspected to ensure that no major blood vessels crossed the  
359 incision site. If the cortical vasculature was suitable, a 3-4 mm craniotomy was made over the  
360 implantation site (centered at 2.2 mm posterior, 1.2-1.7 mm lateral to Bregma). For the smaller

361 microperiscope ( $v1_{CA1}$ ), a 1 mm length anterior-to-posterior incision centered at -2.1 mm  
362 posterior, 1.2 mm lateral to Bregma was then made through the dura, cortex, and mediodorsal  
363 tip of the hippocampus to a depth of 2.2 mm from the pial surface with a sterilized diamond  
364 micro knife (Fine Science Tools, #10100-30) mounted on a manipulator. For the larger  
365 microperiscope ( $v2_{HPC}$ ), two overlapping 1.0 mm length anterior-to-posterior incisions were  
366 made centered at -1.8 mm posterior / 1.7 mm lateral and -2.4 mm posterior / 1.7 mm lateral to  
367 Bregma to a depth of 2.7 mm, with a total anterior-to-posterior incision length of 1.6 mm. Note  
368 that placements in the regions shown in Fig. 1B required incision coordinates slightly posterior  
369 to those indicated on the atlas. Care was taken not to sever any major cortical blood vessels.  
370 Gelfoam (VWR) soaked in sterile saline was used to remove any blood from the incision site.  
371 Once the incision site had no bleeding, the craniotomy was submerged in cold sterile saline,  
372 and the microprism was lowered into the cortex using a manipulator, with the imaging face of  
373 the prism facing lateral. Once the microprism assembly was completely lowered through the  
374 incision until the coverglass was flush with the skull, the edges of the window were sealed with  
375 silicon elastomer (Kwik-Sil, World Precision Instruments), then with dental acrylic (C&B-  
376 Metabond, Parkell) mixed with black ink. Care was taken that the dental cement did not protrude  
377 over the window, as it could potentially scratch the objective lens surface. Given the working  
378 distance of the objective used in this study (3 mm), the smaller microperiscope ( $v1_{CA1}$ ) implant  
379 enabled imaging from 2250 - 2600  $\mu\text{m}$  below the coverglass surface, corresponding to  
380 approximately 150 - 500  $\mu\text{m}$  into the lateral hippocampus (the 150  $\mu\text{m}$  of tissue nearest to the  
381 prism face was not used for imaging). The larger microperiscope ( $v2_{HPC}$ ) implant enabled  
382 imaging from 2650 - 2850  $\mu\text{m}$  below the coverglass surface, corresponding to approximately  
383 150 - 350  $\mu\text{m}$  into the lateral hippocampus (the 150  $\mu\text{m}$  of tissue nearest to the prism face was  
384 not used for imaging). The microprism implantations were stable for up to ten months following  
385 the surgery.

386 After microperiscope implantation, a custom-designed stainless steel head plate  
387 (eMachineShop.com) was affixed using dental acrylic (C&B-Metabond, Parkell) mixed with  
388 black ink. After surgery, mice were administered carprofen (5 - 10 mg kg<sup>-1</sup>, oral) every 24 hr for  
389 3 days to reduce inflammation. Microperiscope designs and head fixation hardware are  
390 available on our institutional lab web site (<https://goard.mcdb.ucsb.edu/resources>).

### 391 **Point Spread Function Measurements**

392 To measure empirical point spread functions, fluorescent microspheres (0.2  $\mu\text{m}$  yellow-green  
393 fluorescent microspheres; ThermoFisher F8811) were embedded 1:2000 in 0.5% agar and  
394 placed under the cranial window or on the face of the microperiscope. Image stacks were taken

395 through the microspheres (0.06  $\mu\text{m}$  per pixel in XY; 0.5  $\mu\text{m}$  per plane in Z), and candidate  
396 microspheres were isolated using a watershed algorithm (Matlab image processing toolbox).  
397 Only microspheres that were >20 pixels (1.2  $\mu\text{m}$ ) away from nearest neighbor microspheres and  
398 completely contained within the Z-stack were used for further analysis. We registered isolated  
399 microspheres at their centroids and measured the full width at half maximum (FWHM) of the  
400 average XY and XZ profiles to determine the lateral and axial resolution, respectively.

401 Since the geometry of the microperiscope limits the angle of the focusing light cone  
402 through the microperiscope, it predominately determines the functional numerical aperture at  
403 the imaging plane. Based on the microperiscope geometry, we calculated the effective NA of  
404 the v1<sub>CA1</sub> microperiscope and v2<sub>HPC</sub>, and used it to calculate the theoretical lateral and axial  
405 resolution according to the following formulae<sup>89</sup>

$$\omega_{XY} = \begin{cases} \frac{0.320 \lambda}{\sqrt{2} NA} & NA < 0.7 \\ \frac{0.325 \lambda}{\sqrt{2} NA^{0.91}} & NA > 0.7 \end{cases}$$
$$\omega_z = \frac{0.532 \lambda}{\sqrt{2}} \left[ \frac{1}{n - \sqrt{n^2 - NA^2}} \right].$$

406 To perform aberration correction with adaptive optics, a deformable mirror (Multi-3.5,  
407 Boston Micromachines Corporation) was set at a plane conjugate to the raster scanning mirrors  
408 and the back aperture of the objective lens in the two-photon imaging system. Fluorescent  
409 microspheres (0.2  $\mu\text{m}$ ) were imaged, and the standard deviation of the image brightness was  
410 maximized under different configurations of the deformable mirror. Twelve selected Zernike  
411 modes are applied and modulated sequentially over a total of three rounds. The 12 zernike  
412 modes are: 1) oblique astigmatism, 2) vertical astigmatism, 3) vertical trefoil, 4) vertical coma, 5)  
413 horizontal coma, 6) oblique trefoil, 7) oblique quadrafoil, 8) oblique secondary astigmatism, 9)  
414 primary spherical, 10) vertical secondary astigmatism, 11) vertical quadrafoil, 12) secondary  
415 spherical. For each Zernike mode, 21 steps of amplitudes were scanned through, and images  
416 were acquired for each step. The amplitude that resulted in the largest standard deviation was  
417 saved and set as the starting point of the DM configuration for the scanning of the next Zernike  
418 mode. The brightness, the lateral resolution, and the axial resolution are compared with and  
419 without the application of the deformable mirror correction.

#### 420 **Air-floated Chamber**

421 For measurement of spatial responses, mice were head-fixed in a floating carbon fiber

422 chamber<sup>34</sup> (Mobile HomeCage, NeuroTar, Ltd). The chamber base was embedded with magnets  
423 to allow continual tracking of the position and angular displacement of the chamber. Behavioral  
424 data was collected via the Mobile HomeCage motion tracking software (NeuroTar, versions  
425 2.2.0.9, 2.2.014, and 2.2.1.0 beta 1). During imaging experiments, image acquisition was  
426 triggered using a TTL pulse from the behavioral software to synchronize the timestamps from  
427 the 2P imaging and chamber tracking.

428 A custom carbon fiber arena (250 mm diameter) was lined with four distinct visual  
429 patterns (5.7 cm tall, 18.1 cm wide) printed on 7 mil waterproof paper (TerraSlate) with black  
430 rectangles (5.7 cm tall and 1.5 cm wide) placed in between the four patterns. A circular track  
431 (Fig. 4A; Video S4) was made by adding a removable inner circle (14 cm in diameter and 4.2  
432 cm tall) with visual cues that were matched to the outer wall printed on 7 mil waterproof paper.  
433 Transparent tactile stickers (Dragon Grips) were placed on the arena floors to give differential  
434 tactile stimuli along the track. In between each recording and or behavioral session, the arena  
435 walls and floors were thoroughly cleaned.

436 Mice were acclimated to the arena by the following steps: 1) On the first day the mice  
437 were placed into the chamber and allowed to freely explore without head fixation for 15 - 20  
438 minutes. A piece of plexiglass with holes drilled through was placed on top of the arena to keep  
439 the mice from climbing out. 2) On the second day, the mice were head-fixed to a crossbar  
440 extending over the floating chamber (Fig. 4A) and allowed to freely explore the floating chamber  
441 freely for 15 minutes. Air flow (3 - 6.5 psi) was adjusted to maximize steady walking/running. On  
442 subsequent days, the head fixation time was increased by increments of 5 minutes, as long as  
443 the mice showed increased distance walked and percent time moving. This was continued until  
444 the mice would explore for 30 - 40 minutes and run for greater than 15% of the time. 3) Mice  
445 were head-fixed in the floated chamber for 20 minutes with a custom light blocker attached to  
446 their headplate. 4) Mice were head-fixed and placed on the 2P microscope to allow habituation  
447 to the microscope noise. 5) After mice were fully habituated, 20 - 40 minute duration recording  
448 sessions on the 2P microscope were performed.

449 If at any point during the above acclimation protocol the mouse significantly decreased  
450 distance traveled or percentage of time moving, then the mouse was moved back to the  
451 previous step.

452 Custom software was written to process the behavioral data output by the Mobile  
453 HomeCage motion tracking software. Because the Mobile HomeCage motion tracking software  
454 sampling rate was faster than the frame rate of our 2P imaging, all behavioral variables (speed,

455 location, polar coordinates, and heading) that were captured within the acquisition of a single 2P  
456 frame were grouped together and their median value was used in future analysis. For the polar  
457 angle (which we used as the location of the mouse in 1D track), the median was computed  
458 using an open source circular statistics toolbox (CircStat 2012a) written for Matlab<sup>90</sup>. We  
459 removed any time points when the mouse was not moving, as is standard for measurement of  
460 place fields<sup>25</sup>. This helps separate processes that are related to navigation from those that are  
461 related to resting state. To do this, we smoothed the measured instantaneous speed and kept  
462 time periods > 1 s that had speeds greater than 20 mm/s (adding an additional 0.5 s buffer on  
463 either side of each time period).

## 464 **Two-photon Imaging**

465 After recovery from surgery and behavioral acclimation, GFP or GCaMP6s fluorescence was  
466 imaged using a Prairie Investigator 2P microscopy system with a resonant galvo scanning  
467 module (Bruker). For fluorescence excitation, we used a Ti:Sapphire laser (Mai-Tai eHP,  
468 Newport) with dispersion compensation (Deep See, Newport) tuned to  $\lambda = 920$  nm. Laser power  
469 ranged from 40-80 mW at the sample depending on GCaMP6s expression levels.  
470 Photobleaching was minimal ( $<1\% \text{ min}^{-1}$ ) for all laser powers used. For collection, we used  
471 GaAsP photomultiplier tubes (H10770PA-40, Hamamatsu). A custom stainless-steel light  
472 blocker (eMachineShop.com) was mounted to the head plate and interlocked with a tube around  
473 the objective to prevent light from the environment from reaching the photomultiplier tubes. For  
474 imaging, we used a 16x/0.8 NA microscope objective (Nikon) to collect 760 x 760 pixel frames  
475 with field sizes of 829 x 829  $\mu\text{m}$  or 415 x 415  $\mu\text{m}$ . Images were collected at 20 Hz and stored at  
476 10 Hz, averaging two scans for each image to reduce shot noise.

477 For imaging spines across days, imaging fields on a given recording session were  
478 aligned based on the average projection from a reference session, guided by stable structural  
479 landmarks such as specific neurons and dendrites. Physical controls were used to ensure  
480 precise placement of the head plate, and data acquisition settings were kept consistent across  
481 sessions. Images were collected once every day for 5 - 10 days.

## 482 **Two-photon Post-processing**

483 Images were acquired using PrairieView acquisition software (Bruker) and converted into multi-  
484 page TIF files.

485 For spine imaging, registration and averaging was performed for each z-plane spanning  
486 the axial width of the dendrite to ensure all spines were captured across z-planes. The resulting



487 projections were weighted according to a Gaussian distribution across planes. Non-rigid  
488 registration was used to align dendritic segments across consecutive recording sessions. The  
489 registered images underwent high-pass filtering to extract low amplitude spine features using  
490 code adapted from Suite2P's enhanced mean image function<sup>91</sup> (Fig. S2A). The resulting ROIs  
491 were binarized using Otsu's global threshold method for spine classification (Fig. S2A). In most  
492 cases, the global threshold successfully isolated the single most prominent dendrite. In fields  
493 with higher background dendrites that were not desired, these extraneous dendrites were  
494 manually excluded. To identify spines that fall below the global threshold, the user manually  
495 specifies incrementally lower thresholds from which to select spines that were excluded in the  
496 initial binarization. (Fig. S2A). Spines above the global threshold with an area of  $>1 \mu\text{m}^2$  were  
497 included in our analysis. To classify each spine as one of the four major morphological classes,  
498 we performed the following steps. First, we found the base of the spine by identifying the region  
499 closest to the dendritic shaft. Second, we calculated the length of the spine by taking the  
500 Euclidean distance between the midpoint of the spine base and the most distant pixel. Third,  
501 this vector was divided evenly into three segments to find the spine head, neck, and base areas  
502 respectively. Finally, spines were classified in the four categories, considering the following  
503 threshold parameters (Fig. S2B): stubby (neck length  $< 0.2 \mu\text{m}$  and aspect ratio  $< 1.3$ ), thin  
504 (neck length  $> 0.2 \mu\text{m}$ , spine length  $< 0.7 \mu\text{m}$ , head circularity  $< 0.8 \mu\text{m}$ ), mushroom (neck  
505 length  $> 0.2 \mu\text{m}$ , head circularity  $> 0.8 \mu\text{m}$ ), and filopodium (neck length  $> 0.2 \mu\text{m}$ , spine length  
506  $< 0.8 \mu\text{m}$ , aspect ratio  $> 1.3$ ).

507 For calcium imaging sessions, the TIF files were processed using the Python  
508 implementation of Suite2P<sup>91</sup>. We briefly summarize their pipeline here. First, TIFs in the image  
509 stack undergo rigid registration using regularized phase correlations. This involves spatial  
510 whitening and then cross-correlating frames. Next, regions of interest (ROIs) are extracted by  
511 clustering correlated pixels, where a low-dimensional decomposition is used to reduce the size  
512 of the data. The number of ROIs is set automatically from a threshold set on the pixel  
513 correlations. We manually checked assigned ROIs based on location, morphology and DF/F  
514 traces.

515 Since the hippocampal pyramidal cells are densely packed and the prism reduces the  
516 axial resolution, we perform local neuropil subtraction using custom code  
517 (<https://github.com/ucsb-goard-lab/two-photon-calcium-post-processing>) to avoid neuropil  
518 contamination. The corrected fluorescence was estimated according to

$$F_{corrected}(n) = F_{soma}(n) - \alpha (F_{neuropil}(n) - \bar{F}_{neuropil}),$$

519  
520 where  $F_{neuropil}$  was defined as the fluorescence in the region  $<30 \mu\text{m}$  from the ROI border  
521 (excluding other ROIs) for frame  $n$ .  $\bar{F}_{neuropil}$  is  $F_{neuropil}$  averaged over all frames.  $\alpha$  was  
522 chosen from  $[0, 1]$  to minimize the Pearson's correlation coefficient between  $F_{corrected}$  and  $F_{neuropil}$ .  
523 The  $\Delta F/F$  for each neuron was then calculated as

$$\frac{\Delta F}{F} = \frac{F_n - F_0}{F_0},$$

524 where  $F_n$  is the corrected fluorescence ( $F_{corrected}$ ) for frame  $n$  and  $F_0$  is defined as the first mode  
525 of the corrected fluorescence density distribution across the entire time series.

526 We deconvolved this neuropil subtracted  $\Delta F/F$  to obtain an estimate for the  
527 instantaneous spike rate, which we used (only) for the computation of neurons' spatial  
528 information (see below). This inferred spike rate was obtained via a MATLAB implementation of  
529 a sparse, nonnegative deconvolution algorithm (OASIS) used for  $\text{Ca}^{2+}$  recordings<sup>92</sup>. We used an  
530 auto-regressive model of order 1 for the convolution kernel.

### 531 Spine Imaging Data Analysis

532 After nonrigid registration, high pass filtering, and binarization of the dendritic segment,  
533 individual spines were extracted based on standard morphological criteria<sup>93</sup>. Spines projecting  
534 laterally from the dendritic segment were extracted and analyzed as individual objects, as  
535 described previously (Fig. S2). The sum of the members of each spine class, as well as the total  
536 number of all spines, was recorded for each session. Spine totals ( $S_{total}$ ) were then broken down  
537 into  $10 \mu\text{m}$  sections of the dendritic segment ( $S_{section}$ ) using the following calculation:

$$S_{section}(n) = \frac{S_{total}(n)}{\left(D_{length} * \frac{F_{\mu\text{m}}}{F_{pixels}}\right)} * 10,$$

538  
539 where length of the dendritic segment,  $D_{length}$ , was determined by skeletonizing the dendritic  
540 shaft to 1 pixel in diameter, then taking the area of the pixels.  $F_{pixels}$  is the FOV in pixels, which  
541 here was  $760 \times 760$  at 16x magnification, and  $F_{\mu\text{m}}$  is the FOV in microns, which was  $52 \times 52 \mu\text{m}$ .

542 Turnover was estimated at 24 h increments; turnover here is defined as the net change  
543 in spines per day for each morphological class (Fig. 2F). To determine which specific spines  
544 were involved in turnover across days, segments recorded 24 h apart were aligned and overlaid

545 using a custom MATLAB interface, which allowed the user to manually select new or removed  
546 spines. Percent addition/subtraction  $S_{a/s}$  was calculated as:

$$S_{a/s} = \frac{N_{a/s}(t)}{N(t)} * 100,$$

547  
548 where  $N_{a/s}(t)$  is spines that have been added or subtracted and  $N(t)$  is the total average number  
549 of spines. To account for variance in spine classification across days, turnover of specific  
550 classes of spines was normalized to total cumulative turnover per day.

551 To calculate the survival fraction curve  $S(t)$ , we determined which spines were present at  
552 time  $t_n$  that were not present at time  $t_0$ <sup>43,44</sup>. The dendritic segment from  $t_0$  was transparently  
553 overlaid with segments from  $t_n$ , and replacement spines that were present in  $t_0$  but not  $t_n$  were  
554 manually identified. Survival fraction was quantified as

$$S(t) = \frac{N_r(t_n)}{N(t_0)} * 100,$$

555  
556 where  $N_r(t_n)$  are the total spines at  $t_n$  that were also found in  $t_0$ , and  $N(t_0)$  are the total number of  
557 spines that were present in  $t_0$ . Survival fraction, as well as % addition and subtraction, was  
558 calculated in 10  $\mu\text{m}$  sections to control for segment length.

## 559 **Calcium Imaging Data Analysis**

560 For calcium imaging experiments during exploration of the air-floated chamber,  
561 processed and synchronized behavioral data and 2P imaging data were used to identify place  
562 and speed cells as follows.

563 First, the 1D track was divided into 72 equal bins (each  $\sim 0.85$  cm in length). Activity as a  
564 function of position (we refer to these as spatial tuning curves) was computed for each lap, with  
565 activity divided by occupancy of each binned location. To avoid misattribution of slow calcium  
566 signals to spatial bins, any lap where the average instantaneous speed was greater than 180  
567 mm/s, or where the total length of the lap took less than 1 second, were removed and not  
568 considered for further analysis. To assess the consistency of spatial coding of each cell, we  
569 randomly split the laps into two groups and computed the correlation coefficient between the  
570 averaged spatial tuning curves. We then did the same for shuffled data in which each lap's  
571 spatial tuning curve was circularly permuted by a random number of bins. This was performed  
572 500 times, and the distribution of actual correlation coefficient values was compared to the

573 distribution of circularly shuffled values using a two-sample Kolmogorov-Smirnov test ( $\alpha = 0.01$ ).  
574 A cell that passed this test was considered a “consistent” cell.

575 To identify a neuron as a place cell, the neuron had to pass the consistency test and  
576 also be well fit by a Gaussian function,  $R_{DF/F} = A_0 + A e^{\left(\frac{(x-B)}{c}\right)^2}$ , with  $\text{FWHM} = 2C\sqrt{\log 2}$ .  
577 Specifically, we required that: 1) the adjusted  $R^2 > 0.375$ ; 2)  $2.5\text{cm} < \text{FWHM} < 30.6\text{ cm}$  (50% of  
578 track length); 3)  $A > 0$ ; 4)  $A/A_0 > 0.50$ . Cells that met these conditions were characterized as  
579 place cells; with place fields at the location of maximal activity and width defined as the FWHM.

580 Speed cells were identified using a standard process developed for identification of  
581 speed cells in medial enthorinal cortex and hippocampus<sup>62–64</sup>. We computed the Pearson  
582 correlation of each cells’ DF/F trace with the mouse’s speed across the experiment. This value  
583 is considered as a “speed score”. We then circularly shuffled the DF/F 100 times (making sure  
584 that the amount shuffled was greater than 10 frames to ensure that the shuffled distribution did  
585 not have artificially high correlations). Cells whose speed score was greater than 99%, or less  
586 than 1%, of the shuffled distribution were considered speed cells.

587 To compute the spatial information<sup>94</sup> of cell  $j$  ( $SI_j$ ), we used the following formula

$$SI_j = \frac{1}{\bar{a}_j} \sum_{k=1}^{72} p(k) a_j(k) \log_2 \left[ \frac{a_j(k)}{\bar{a}_j} \right]$$

588 where  $\bar{a}_j$  is the mean inferred spike rate of cell  $j$ ,  $a_j(k)$  is the mean inferred spike rate of cell  $j$  at  
589 position bin  $k$ , and  $p(k)$  is the probability of being at position bin  $k$ . We divide by  $\bar{a}_j$  to have SI in  
590 units of bits/inferred spike.

591 To align recordings where we recorded along the CA1-DG axis, we found the inflection  
592 point of the axis and then computed the distance of each cell to that point. To do this, we  
593 performed the following steps. 1) We extracted the position of each identified cell using  
594 Suite2p’s centroid output. 2) We then fit a function of the form  $a(x - b)^2 + c$  to the cell positions  
595 by rotating the field-of-view from 0 to 180 degrees and finding the rotation that maximized the  $R^2$   
596 value of the fit. 3) We determined the inflection point as the peak of the curve and de-rotated the  
597 fit to determine the inflection point and curve in the original coordinates. The distance of each  
598 cell to the inflection point was found by finding the point along the fit curve that had the minimal  
599 distance to the cells centroid.

## 600 **Immunohistochemistry**

601 Samples were perfusion fixed using 4% paraformaldehyde in 0.1M sodium cacodylate buffer  
602 (pH = 7.4) for 10 mins, and then immersion fixed overnight at 4°C. Next, sections were rinsed in  
603 cold PBS 5 x 5 mins and 1 x 1hr. Whole brains were then embedded in 10% low-melting  
604 agarose. Subsequently, 100  $\mu$ m coronal sections were cut using a vibratome (Leica, Lumberton,  
605 NJ). Sections were then blocked overnight in normal donkey serum (Jackson ImmunoResearch;  
606 West Grove, PA) diluted 1:20 in PBS containing 0.5% bovine serum albumin, 0.1% Triton-X  
607 100, and 0.1% sodium azide, hereafter, PBTA at 4°C. Next, primary antibodies anti-GFAP  
608 (1:500; abcam; ab53554), anti-S100 (1:1000; DAKO; Z0311) were diluted in PBTA and  
609 incubated overnight at 4°C. Then, sections were rinsed 5 x 5 mins and 1 x 1hr before  
610 corresponding secondary antibodies along with the nuclear stain Hoechst33342 (1:5000;  
611 Molecular Probes; H-3570) were incubated overnight at 4°C. Lastly, secondary antibodies were  
612 rinsed and sections mounted using Vectashield (Vector laboratories Inc; H-1200) and sealed  
613 under #0 coverslips.

614 High resolution wide-field mosaics of brain samples were then imaged with a 20x oil  
615 immersion lens and an Olympus Fluoview 1000 laser scanning confocal microscope (Center  
616 Valley, PA) at a pixel array of 800 x 800 and then registered using the bio-image software  
617 Imago (Santa Barbara CA).

618 We then calculated glial cell density as a function of distance from the prism face. First,  
619 each mosaic was rotated so that the medial-lateral axis of the brain sample was aligned to be  
620 parallel with the horizontal axis of the image. Then each mosaic was cropped to remove  
621 extraneous pixels outside of the imaged brain slice. Next, a line denoting the face of the prism  
622 was manually drawn parallel to the dorsal-ventral axis aligned with the location of the prism  
623 face. We then used a custom cell-counting algorithm that identified potential regions of interest  
624 (ROIs). We limited the ROIs to be within the hippocampal formation in the brain slices. The  
625 euclidean distance between the closest point on the defined prism face and each ROI's centroid  
626 was calculated. Afterward, a similar procedure was performed on the contralateral side of the  
627 brain slice, with a mock "prism face" defined at symmetric coordinates to the true prism face, to  
628 serve as a control. These steps were repeated for each channel of the mosaic.

629 After extracting each ROIs distance from the prism face, we counted the number of cells  
630 in each 50  $\mu$ m distance bin. To account for basal glial cell density, we calculated the percent  
631 change of glial cell density on the prism side with respect to the control side. This procedure

632 was repeated 1000 times using randomly sampled distances, with replacement, to bootstrap the  
633 sample variance.

#### 634 **Statistical Information**

635 Violin plots were made using an open source Matlab package<sup>95</sup>. Statistical tests for spine  
636 morphological types were calculated using a one-way ANOVA. Reliability across laps was  
637 tested with a two-sample Kolmogorov-Smirnov test. Comparisons between model fits for spatial  
638 distribution of spatial information and place field width used a General Linear F-test.

### **DATA AVAILABILITY**

Microperiscope designs can be found on our institutional lab website (<https://goard.mcdb.ucsb.edu/resources>). Spine imaging data from Fig. 2 and neuronal response data from Figs. 4-5 are available on Dryad (DOI: TBA, final version will be uploaded upon manuscript acceptance). Code for spine analysis and place/speed cell identification is available on Github (DOI: TBA, final version will be uploaded upon manuscript acceptance).

### **REFERENCES**

1. O'Keefe, J. & Nadel, L. *The Hippocampus as a Cognitive Map*. (Oxford University Press, 1978).
2. Squire, L. R. Memory and the Hippocampus: A Synthesis From Findings With Rats, Monkeys, and Humans. *Psychol. Rev.* **99**, 195–231 (1992).
3. Tonegawa, S., Liu, X., Ramirez, S. & Redondo, R. Memory Engram Cells Have Come of Age. *Neuron* vol. 87 918–931 (2015).
4. Ramon y Cajal, S. *Histologie du système nerveux de l'homme et des vertèbres*. (Maloine, 1911).
5. Gilbert, P. E., Kesner, R. P. & Lee, I. Dissociating hippocampal subregions: A double dissociation between dentate gyrus and CA1. *Hippocampus* **11**, 626–636 (2001).
6. Lee, I., Yoganarasimha, D., Rao, G. & Knierim, J. J. Comparison of population coherence of place cells in hippocampal subfields CA1 and CA3. *Nature* **430**, 456–459 (2004).
7. Leutgeb, S., Leutgeb, J. K., Treves, A., Moser, M. B. & Moser, E. I. Distinct ensemble codes in hippocampal areas CA3 and CA1. *Science* **305**, 1295–1298 (2004).
8. Leutgeb, J. K. *et al.* Progressive transformation of hippocampal neuronal representations in 'morphed' environments. *Neuron* **48**, 345–358 (2005).
9. Leutgeb, J. K., Leutgeb, S., Moser, M. B. & Moser, E. I. Pattern separation in the dentate gyrus and CA3 of the hippocampus. *Science* **315**, 961–966 (2007).



10. McHugh, T. J. *et al.* Dentate gyrus NMDA receptors mediate rapid pattern separation in the hippocampal network. *Science* **317**, 94–99 (2007).
11. Nakashiba, T. *et al.* Young dentate granule cells mediate pattern separation, whereas old granule cells facilitate pattern completion. *Cell* **149**, 188–201 (2012).
12. Kheirbek, M. A. *et al.* Differential control of learning and anxiety along the dorsoventral axis of the dentate gyrus. *Neuron* **77**, 955–968 (2013).
13. Neunuebel, J. P. & Knierim, J. J. CA3 retrieves coherent representations from degraded input: Direct evidence for CA3 pattern completion and dentate gyrus pattern separation. *Neuron* **81**, 416–427 (2014).
14. Rennó-Costa, C., Lisman, J. E. & Verschure, P. F. M. J. A Signature of Attractor Dynamics in the CA3 Region of the Hippocampus. *PLoS Comput. Biol.* **10**, e1003641 (2014).
15. Frank, L. M., Stanley, G. B. & Brown, E. N. Hippocampal plasticity across multiple days of exposure to novel environments. *J. Neurosci.* **24**, 7681–7689 (2004).
16. Karlsson, M. P. & Frank, L. M. Network dynamics underlying the formation of sparse, informative representations in the hippocampus. *J. Neurosci.* **28**, 14271–14281 (2008).
17. Kemere, C., Carr, M. F., Karlsson, M. P. & Frank, L. M. Rapid and continuous modulation of hippocampal network state during exploration of new places. *PLoS One* **8**, e73114 (2013).
18. Larkin, M. C., Lykken, C., Tye, L. D., Wickelgren, J. G. & Frank, L. M. Hippocampal output area CA1 broadcasts a generalized novelty signal during an object-place recognition task. *Hippocampus* **24**, 773–783 (2014).
19. Dong, C., Madar, A. D. & Sheffield, M. E. J. Distinct place cell dynamics in CA1 and CA3 encode experience in new environments. *Nat. Commun.* **12**, 1–13 (2021).
20. Hitti, F. L. & Siegelbaum, S. A. The hippocampal CA2 region is essential for social memory. *Nature* **508**, 88–92 (2014).
21. Okuyama, T., Kitamura, T., Roy, D. S., Itohara, S. & Tonegawa, S. Ventral CA1 neurons store social memory. *Science* **353**, 1536–1541 (2016).
22. Meira, T. *et al.* A hippocampal circuit linking dorsal CA2 to ventral CA1 critical for social memory dynamics. *Nat. Commun.* **9**, 1–14 (2018).
23. Mankin, E. A. *et al.* Neuronal code for extended time in the hippocampus. *Proc. Natl. Acad. Sci. U. S. A.* **109**, 19462–19467 (2012).
24. Hainmueller, T. & Bartos, M. Parallel emergence of stable and dynamic memory engrams in the hippocampus. *Nature* **558**, 292–296 (2018).
25. Dombeck, D. A., Harvey, C. D., Tian, L., Looger, L. L. & Tank, D. W. Functional imaging of hippocampal place cells at cellular resolution during virtual navigation. *Nat. Neurosci.* **13**, 1433–

- 1440 (2010).
26. Ghosh, K. K. *et al.* Miniaturized integration of a fluorescence microscope. *Nat. Methods* **8**, 871–878 (2011).
  27. Ziv, Y. *et al.* Long-term dynamics of CA1 hippocampal place codes. *Nat. Neurosci.* **16**, 264–266 (2013).
  28. Cai, D. J. *et al.* A shared neural ensemble links distinct contextual memories encoded close in time. *Nature* **534**, 115–118 (2016).
  29. Sheintuch, L. *et al.* Tracking the Same Neurons across Multiple Days in Ca<sup>2+</sup> Imaging Data. *Cell Rep.* **21**, 1102–1115 (2017).
  30. Chia, T. H. & Levene, M. J. Microprisms for in vivo multilayer cortical imaging. *J. Neurophysiol.* **102**, 1310–1314 (2009).
  31. Andermann, M. L. *et al.* Chronic Cellular Imaging of Entire Cortical Columns in Awake Mice Using Microprisms. *Neuron* **80**, 900–913 (2013).
  32. Low, R. J., Gu, Y. & Tank, D. W. Cellular resolution optical access to brain regions in fissures: Imaging medial prefrontal cortex and grid cells in entorhinal cortex. *Proc. Natl. Acad. Sci. U. S. A.* **111**, 18739–18744 (2014).
  33. Gu, Y. *et al.* A Map-like Micro-Organization of Grid Cells in the Medial Entorhinal Cortex. *Cell* **175**, 736–750.e30 (2018).
  34. Kislin, M. *et al.* Flat-floored air-lifted platform: A new method for combining behavior with microscopy or electrophysiology on awake freely moving rodents. *J. Vis. Exp.* (2014) doi:10.3791/51869.
  35. Go, M. A. *et al.* Place Cells in Head-Fixed Mice Navigating a Floating Real-World Environment. *Front. Cell. Neurosci.* **15**, 618658 (2021).
  36. Lee, H., Wang, C., Deshmukh, S. S. & Knierim, J. J. Neural Population Evidence of Functional Heterogeneity along the CA3 Transverse Axis: Pattern Completion versus Pattern Separation. *Neuron* **87**, 1093–1105 (2015).
  37. Lu, L., Igarashi, K. M., Witter, M. P., Moser, E. I. & Moser, M. B. Topography of Place Maps along the CA3-to-CA2 Axis of the Hippocampus. *Neuron* **87**, 1078–1092 (2015).
  38. Mankin, E. A., Diehl, G. W., Sparks, F. T., Leutgeb, S. & Leutgeb, J. K. Hippocampal CA2 Activity Patterns Change over Time to a Larger Extent than between Spatial Contexts. *Neuron* **85**, 190–201 (2015).
  39. Engert, F. & Bonhoeffer, T. Dendritic spine changes associated with hippocampal long-term synaptic plasticity. *Nature* **399**, 66–70 (1999).
  40. Harris, K. M. Structure, development, and plasticity of dendritic spines. *Curr. Opin. Neurobiol.* **9**,

- 343–348 (1999).
41. Yuste, R. & Bonhoeffer, T. Morphological changes in dendritic spines associated with long-term synaptic plasticity. *Annual Review of Neuroscience* vol. 24 1071–1089 (2001).
  42. Yang, G., Pan, F. & Gan, W. B. Stably maintained dendritic spines are associated with lifelong memories. *Nature* **462**, 920–924 (2009).
  43. Attardo, A., Fitzgerald, J. E. & Schnitzer, M. J. Impermanence of dendritic spines in live adult CA1 hippocampus. *Nature* **523**, 592–596 (2015).
  44. Pfeiffer, T. *et al.* Chronic 2P-STED imaging reveals high turnover of dendritic spines in the hippocampus in vivo. *Elife* **7:e34700**, (2018).
  45. Feng, G. *et al.* Imaging neuronal subsets in transgenic mice expressing multiple spectral variants of GFP. *Neuron* **28**, 41–51 (2000).
  46. Chang, F. L. F. & Greenough, W. T. Transient and enduring morphological correlates of synaptic activity and efficacy change in the rat hippocampal slice. *Brain Res.* **309**, 35–46 (1984).
  47. Rodriguez, A., Ehlenberger, D. B., Dickstein, D. L., Hof, P. R. & Wearne, S. L. Automated three-dimensional detection and shape classification of dendritic spines from fluorescence microscopy images. *PLoS One* **3**, 1997 (2008).
  48. Son, J., Song, S., Lee, S., Chang, S. & Kim, M. Morphological change tracking of dendritic spines based on structural features. *J. Microsc.* **241**, 261–272 (2011).
  49. Lendvai, B., Stern, E. A., Chen, B. & Svoboda, K. Experience-dependent plasticity of dendritic spines in the developing rat barrel cortex in vivo. *Nature* **404**, 876–881 (2000).
  50. Risher, W. C., Ustunkaya, T., Alvarado, J. S. & Eroglu, C. Rapid golgi analysis method for efficient and unbiased classification of dendritic spines. *PLoS One* **9**, e107591 (2014).
  51. Fiala, J. C., Feinberg, M., Popov, V. & Harris, K. M. Synaptogenesis via dendritic filopodia in developing hippocampal area CA1. *J. Neurosci.* **18**, 8900–8911 (1998).
  52. Stewart, M. G. *et al.* Chemically induced long-term potentiation increases the number of perforated and complex postsynaptic densities but does not alter dendritic spine volume in CA1 of adult mouse hippocampal slices. *Eur. J. Neurosci.* **21**, 3368–3378 (2005).
  53. Grutzendler, J., Kasthuri, N. & Gan, W. B. Long-term dendritic spine stability in the adult cortex. *Nature* **420**, 812–816 (2002).
  54. Trachtenberg, J. T. *et al.* Long-term in vivo imaging of experience-dependent synaptic plasticity in adult cortex. *Nature* **420**, 788–794 (2002).
  55. Holtmaat, A. J. G. D. *et al.* Transient and persistent dendritic spines in the neocortex in vivo. *Neuron* **45**, 279–291 (2005).
  56. van Dijk, M. T. & Fenton, A. A. On How the Dentate Gyrus Contributes to Memory Discrimination.

- Neuron* **98**, 832-845.e5 (2018).
57. Stefanini, F. *et al.* A Distributed Neural Code in the Dentate Gyrus and in CA1. *Neuron* **107**, 703-716.e4 (2020).
  58. Chen, T. W. *et al.* Ultrasensitive fluorescent proteins for imaging neuronal activity. *Nature* **499**, 295–300 (2013).
  59. Daigle, T. L. *et al.* A Suite of Transgenic Driver and Reporter Mouse Lines with Enhanced Brain-Cell-Type Targeting and Functionality. *Cell* **174**, 465-480.e22 (2018).
  60. Aronov, D. & Tank, D. W. Engagement of Neural Circuits Underlying 2D Spatial Navigation in a Rodent Virtual Reality System. *Neuron* **84**, 442–456 (2014).
  61. Aghajan, Z. M. *et al.* Impaired spatial selectivity and intact phase precession in two-dimensional virtual reality. *Nat. Neurosci.* **18**, 121–128 (2015).
  62. Kropff, E., Carmichael, J. E., Moser, M. B. & Moser, E. I. Speed cells in the medial entorhinal cortex. *Nature* **523**, 419–424 (2015).
  63. Iwase, M., Kitanishi, T. & Mizuseki, K. Cell type, sub-region, and layer-specific speed representation in the hippocampal–entorhinal circuit. *Sci. Rep.* **10**, 1–23 (2020).
  64. Góis, Z. H. T. D. & Tort, A. B. L. Characterizing Speed Cells in the Rat Hippocampus. *Cell Rep.* **25**, 1872-1884.e4 (2018).
  65. Claiborne, B. J., Amaral, D. G. & Cowan, W. M. A light and electron microscopic analysis of the mossy fibers of the rat dentate gyrus. *J. Comp. Neurol.* **246**, 435–458 (1986).
  66. Ishizuka, N., Weber, J. & Amaral, D. G. Organization of intrahippocampal projections originating from CA3 pyramidal cells in the rat. *J. Comp. Neurol.* **295**, 580–623 (1990).
  67. Li, X. -G, Somogyi, P., Ylinen, A. & Buzsáki, G. The hippocampal CA3 network: An in vivo intracellular labeling study. *J. Comp. Neurol.* **339**, 181–208 (1994).
  68. Ishizuka, N., Cowan, W. M. & Amaral, D. G. A quantitative analysis of the dendritic organization of pyramidal cells in the rat hippocampus. *J. Comp. Neurol.* **362**, 17–45 (1995).
  69. Witter, M. P. Intrinsic and extrinsic wiring of CA3: Indications for connectional heterogeneity. *Learning and Memory* vol. 14 705–713 (2007).
  70. Levene, M. J., Dombeck, D. A., Kasischke, K. A., Molloy, R. P. & Webb, W. W. In Vivo Multiphoton Microscopy of Deep Brain Tissue. *J. Neurophysiol.* **91**, 1908–1912 (2004).
  71. Barretto, R. P. J. *et al.* Time-lapse imaging of disease progression in deep brain areas using fluorescence microendoscopy. *Nat. Med.* **17**, 223–229 (2011).
  72. Chambers, A. R. & Rumpel, S. A stable brain from unstable components: Emerging concepts and implications for neural computation. *Neuroscience* vol. 357 172–184 (2017).

73. Mongillo, G., Rumpel, S. & Loewenstein, Y. Intrinsic volatility of synaptic connections — a challenge to the synaptic trace theory of memory. *Current Opinion in Neurobiology* vol. 46 7–13 (2017).
74. Kentros, C. G., Agnihotri, N. T., Streater, S., Hawkins, R. D. & Kandel, E. R. Increased attention to spatial context increases both place field stability and spatial memory. *Neuron* **42**, 283–295 (2004).
75. Kinsky, N. R., Sullivan, D. W., Mau, W., Hasselmo, M. E. & Eichenbaum, H. B. Hippocampal Place Fields Maintain a Coherent and Flexible Map across Long Timescales. *Curr. Biol.* **28**, 3578–3588.e6 (2018).
76. Mau, W., Hasselmo, M. E. & Cai, D. J. The brain in motion: How ensemble fluidity drives memory-updating and flexibility. *Elife* **9**:e63550, 1–24 (2020).
77. Wilson, M. A. & McNaughton, B. L. Dynamics of the hippocampal ensemble code for space. *Science* **261**, 1055–1058 (1993).
78. Danielson, N. B. *et al.* In Vivo Imaging of Dentate Gyrus Mossy Cells in Behaving Mice. *Neuron* **93**, 552–559.e4 (2017).
79. GoodSmith, D. *et al.* Spatial Representations of Granule Cells and Mossy Cells of the Dentate Gyrus. *Neuron* **93**, 677–690.e5 (2017).
80. Senzai, Y. & Buzsáki, G. Physiological Properties and Behavioral Correlates of Hippocampal Granule Cells and Mossy Cells. *Neuron* **93**, 691–704.e5 (2017).
81. Mongillo, G., Rumpel, S. & Loewenstein, Y. Inhibitory connectivity defines the realm of excitatory plasticity. *Nat. Neurosci.* **21**, 1463–1470 (2018).
82. Sheffield, M. E. J. & Dombeck, D. A. Calcium transient prevalence across the dendritic arbour predicts place field properties. *Nature* **517**, 200–204 (2015).
83. Sheffield, M. E. J., Adoff, M. D. & Dombeck, D. A. Increased Prevalence of Calcium Transients across the Dendritic Arbor during Place Field Formation. *Neuron* **96**, 490–504.e5 (2017).
84. Adoff, M. D. *et al.* The functional organization of excitatory synaptic input to place cells. *Nat. Commun.* **12**, (2021).
85. Jia, H., Rochefort, N. L., Chen, X. & Konnerth, A. Dendritic organization of sensory input to cortical neurons in vivo. *Nature* **464**, 1307–1312 (2010).
86. Wilson, D. E., Whitney, D. E., Scholl, B. & Fitzpatrick, D. Orientation selectivity and the functional clustering of synaptic inputs in primary visual cortex. *Nat. Neurosci.* **19**, 1003–1009 (2016).
87. Wang, Q. *et al.* The Allen Mouse Brain Common Coordinate Framework: A 3D Reference Atlas. *Cell* **181**, 936–953.e20 (2020).
88. Paxinos, G. & Franklin, K. B. J. *The Mouse Brain in Stereotaxic Coordinates*. (Academic Press,

- 2001).
89. Zipfel, W. R., Williams, R. M. & Webb, W. W. Nonlinear magic: Multiphoton microscopy in the biosciences. *Nature Biotechnology* vol. 21 1369–1377 (2003).
  90. Berens, P. CircStat : A MATLAB Toolbox for Circular Statistics. *J. Stat. Softw.* **31**, 1–21 (2009).
  91. Pachitariu, M. *et al.* Suite2p: beyond 10,000 neurons with standard two-photon microscopy. *bioRxiv* 061507 (2016) doi:10.1101/061507.
  92. Friedrich, J., Zhou, P. & Paninski, L. Fast online deconvolution of calcium imaging data. *PLoS Comput. Biol.* **13**, (2017).
  93. Holtmaat, A. & Svoboda, K. Experience-dependent structural synaptic plasticity in the mammalian brain. *Nature Reviews Neuroscience* vol. 10 647–658 (2009).
  94. Skaggs, W., McNaughton, B. & Gothard, K. An Information-Theoretic Approach to Deciphering the Hippocampal Code. *Adv. Neural Inf. Process. Syst.* **5**, 1030--1037 (1993).
  95. Bechtold, B. Violin Plots for Matlab, Github Project. (2016).

## ACKNOWLEDGEMENTS

We would like to thank Caleb Kamere and Elliott Levy for comments on the manuscript. This work was supported by NSF (M.J.G., S.L.S., NeuroNex #1707287), NIH (M.J.G., S.L.S., R01NS121919), the Whitehall Foundation (M.J.G.), and the Larry Hillblom foundation (M.J.G.).

## AUTHOR CONTRIBUTIONS

W.T.R. and M.J.G. designed the experiments; M.J.G. performed the surgical implants; W.T.R., N.S.W., L.M., and M.J.G. conducted the imaging experiments and analyzed the data; G.L. and T.D.M. performed immunohistochemistry and K.K.S. analyzed the resulting images; C.H.Y. and S.L.C. performed optical modeling; W.T.R., N.S.W., and M.J.G. wrote the manuscript.

## COMPETING INTERESTS

The authors declare no competing financial interests.

## MATERIALS AND CORRESPONDENCE

Correspondence and material requests should be directed to [michael.goard@lifesci.ucsb.edu](mailto:michael.goard@lifesci.ucsb.edu).
